## The RNA-binding ubiquitin ligase MKRN1 functions in ribosome-associated quality control of poly(A) translation

Andrea Hildebrandt<sup>1</sup>, Mirko Brüggemann<sup>2</sup>, Susan Boerner<sup>2</sup>, Cornelia Rücklé<sup>2</sup>, Jan Bernhard Heidelberger<sup>1</sup>, Annabelle Dold<sup>1</sup>, Anke Busch<sup>1</sup>, Heike Hänel<sup>1</sup>, Andrea Voigt<sup>1</sup>, Stefanie Ebersberger<sup>1</sup>, Ingo Ebersberger<sup>3,4</sup>, Jean-Yves Roignant<sup>1</sup>, Kathi Zarnack<sup>2§</sup>, Julian König<sup>1§</sup>, Petra Beli<sup>1§</sup>

<sup>1</sup> Institute of Molecular Biology (IMB), Ackermannweg 4, 55128 Mainz, Germany

<sup>2</sup> Buchmann Institute of Molecular Life Sciences (BMLS), Goethe University, Max-von-Laue-Str. 15, 60438 Frankfurt am Main, Germany

<sup>3</sup> Department for Applied Bioinformatics, Institute of Cell Biology and Neuroscience, Goethe University, Max-von-Laue-Str. 13, 60438 Frankfurt am Main, Germany

<sup>4</sup> Senckenberg Biodiversity and Climate Research Centre (BiK-F), Georg-Voigt-Straße 14-16, 60325 Frankfurt am Main, Germany

§ Corresponding authors:

KZ ([kathi.zarnack@bmls.de](mailto:kathi.zarnack@bmls.de)), JK ([j.koenig@imb-mainz.de](mailto:j.koenig@imb-mainz.de)) and PB ([p.beli@imb-mainz.de](mailto:p.beli@imb-mainz.de))

## 1 **Abstract**

2 Cells have evolved quality control mechanisms to ensure protein homeostasis by  
3 detecting and degrading aberrant mRNAs and proteins. A common source of aberrant  
4 mRNAs is premature polyadenylation, which can result in non-functional protein  
5 products. Translating ribosomes that encounter poly(A) sequences are terminally  
6 stalled, followed by ribosome recycling and decay of the truncated nascent polypeptide  
7 via the ribosome-associated quality control (RQC). Here, we demonstrate that the  
8 conserved RNA-binding E3 ubiquitin ligase Makorin Ring Finger Protein 1 (MKRN1)  
9 promotes ribosome stalling at poly(A) sequences during RQC. We show that MKRN1  
10 interacts with the cytoplasmic poly(A)-binding protein (PABP) and is positioned  
11 upstream of poly(A) tails in mRNAs. Ubiquitin remnant profiling uncovers PABP and  
12 ribosomal protein RPS10, as well as additional translational regulators as main  
13 ubiquitylation substrates of MKRN1. We propose that MKRN1 serves as a first line of  
14 poly(A) recognition at the mRNA level to prevent production of erroneous proteins, thus  
15 maintaining proteome integrity.

## 16 **Keywords**

17 MKRN1, ubiquitylation, RNA binding, ribosome-associated quality control, RQC,  
18 poly(A), iCLIP, ubiquitin remnant profiling, translation

## 19 **Abbreviations**

20 Adenosine (A), Makorin Ring Finger Protein 1 (MKRN1), ribosome-associated quality  
21 control (RQC), poly(A)-binding protein (PABP), mass spectrometry (MS), affinity  
22 purification (AP), stable isotope labelling with amino acids in cell culture (SIALC), false  
23 discovery rate (FDR), Gene Ontology (GO), Biological Process (BP), Molecular  
24 Function (MF), mRNA ribonucleoprotein particle (mRNP), PABP-interacting motif  
25 (PAM2), MKRN1 variant with point mutations in the PAM2 motif (GFP-MKRN1<sup>PAM2mut</sup>),  
26 MKRN1 variant with point mutation in RING domain (GFP-MKRN1<sup>RINGmut</sup>), individual-  
27 nucleotide resolution UV crosslinking and immunoprecipitation (iCLIP), signal-over-  
28 background (SOB), nucleotides (nt), 4-thiouridine (4SU), Pearson correlation  
29 coefficients (r), A-rich stretches (A-stretches), lysine (K), knock down (KD), RNA  
30 recognition motif (RRM), Polyethylenimine (PEI), modified RIPA (mRIPA), N-  
31 ethylmaleimide (NEM), dithiothreitol (DTT), chloroacetamide (CAA), higher-energy  
32 collisional dissociation (HCD), glycine-glycine (GlyGly), strong-cation exchange  
33 chromatography (SCX)

## 34 **Introduction**

35 During gene expression, quality control pathways monitor each step to detect aberrant  
36 mRNAs and proteins. These mechanisms ensure protein homeostasis and are  
37 essential to prevent neurodegenerative diseases (Chu et al. 2009). A common source  
38 of aberrant mRNAs is premature polyadenylation, often in combination with mis-  
39 splicing, which results in truncated non-functional protein products (Kaida et al. 2010).  
40 Therefore, mechanisms are in place that recognise such homopolymeric adenosine  
41 (poly(A)) sequences and abrogate their translation (Bengtson and Joazeiro 2010).

42 In eukaryotes, ribosomes that terminally stall for diverse reasons during translation are  
43 detected by the ribosome-associated quality control (RQC) (reviewed in Brandman and  
44 Hegde 2016; Joazeiro 2017). Upon splitting of the 60S and 40S ribosomal subunits,  
45 the RQC complex assembles on the stalled 60S subunit to initiate the release and  
46 rapid degradation of the truncated tRNA-bound polypeptide. The E3 ubiquitin ligase  
47 Listerin (LTN1) modifies the truncated polypeptide with K48-linked ubiquitin chains to  
48 target it for degradation in a p97-dependent manner through the proteasome  
49 (Bengtson and Joazeiro 2010; Brandman et al. 2012; Verma et al. 2013). Whereas  
50 peptide release and ribosome recycling by the RQC complex are relatively well  
51 understood, less is known about the mechanisms that promote poly(A) recognition and  
52 initial ribosome stalling.

53 Several recent studies demonstrated a role for the RNA-binding E3 ubiquitin ligase  
54 ZNF598 in initiating RQC for prematurely polyadenylated mRNAs (Garzia et al. 2017;  
55 Juskiewicz and Hegde 2017; Sundaramoorthy et al. 2017). It was suggested that  
56 ZNF598 senses the translation of poly(A) segments through binding the cognate lysine  
57 tRNAs (Garzia et al. 2017). In addition, ZNF598 recognises the collided di-ribosome  
58 structure that arises when a trailing ribosome encounters a slower leading ribosome

59 (Juszkiewicz et al. 2018). This is followed by site-specific, regulatory ubiquitylation of  
60 the 40S ribosomal proteins RPS10 and RPS20 by ZNF598. In addition to ZNF598, the  
61 40S ribosomal subunit-associated protein RACK1 was shown to regulate ubiquitylation  
62 of RPS2 and RPS3 upstream of ribosomal rescue (Sundaramoorthy et al. 2017).

63 Makorin Ring Finger Protein 1 (MKRN1) belongs to a family of evolutionary conserved  
64 RNA-binding E3 ubiquitin ligases. Up to four paralogs exist in vertebrates (MKRN1-4),  
65 which combine a RING domain with one or more CCCH zinc finger domains (Gray et  
66 al. 2000; Böhne et al. 2010) (**Supplemental Fig. 1A**). MKRN1 has been implicated in  
67 the regulation of telomere length, RNA polymerase II transcription and the turnover of  
68 tumour suppressor protein p53 and cell cycle regulator p21 (Kim et al. 2005;  
69 Omwancha et al. 2006; Lee et al. 2009; Salvatico et al. 2010), but its RNA-related  
70 functions remain poorly understood. A study in mouse embryonic stem cells (mESC)  
71 reported its interaction with hundreds of mRNAs as well as multiple RNA-binding  
72 proteins (RBPs), including the cytoplasmic poly(A)-binding protein (PABP) PABPC1,  
73 IGF2BP1 and ELAVL1 (Cassar et al. 2015). The interaction with PABP was further  
74 corroborated in human HEK293 cells (Miroci et al. 2012). The same study  
75 demonstrated that a shortened isoform of MKRN1 controls local translation via its  
76 PABP-interacting motif 2 (PAM2 motif) in rat neurons (Miroci et al. 2012). In line with  
77 a role in translation, MKRN1 was found in association with ribosomes, from which it  
78 could be released together with PABP and other proteins by RNase digestion (Simsek  
79 et al. 2017). Nevertheless, the RNA binding specificity and functional role of MKRN1  
80 in human cells remained largely elusive.

81 Here, we introduce MKRN1 as a novel factor in RQC. We propose that MKRN1 is  
82 recruited to A-rich sequences in mRNAs in a PABP-dependent manner, where it acts  
83 as a first line of defence against poly(A) translation. MKRN1 depletion abrogates

84 ribosome stalling in reporter assays, accompanied by reduced ubiquitylation of RQC-  
85 related proteins. We therefore hypothesise that MKRN1 allows recognition of poly(A)  
86 sequences prior to their translation.

## 87 **Results**

### 88 **MKRN1 interacts with PABPC1 and other RBPs**

89 In order to learn about potential functions, we first characterised the protein interaction  
90 profile of MKRN1 in HEK293T cells. To this end, we used affinity purification (AP)  
91 coupled to stable isotope labelling with amino acids in cell culture (SILAC)-based  
92 quantitative mass spectrometry (MS) using GFP-MKRN1<sup>wt</sup> or GFP as a bait. We  
93 identified 53 proteins that were significantly enriched in GFP-MKRN1<sup>wt</sup> compared to  
94 the control APs (false discovery rate [FDR] < 5%, combined ratios of three independent  
95 experiments). In line with previous reports (Miroci et al. 2012; Cassar et al. 2015;  
96 Hildebrandt et al. 2017), we found the cytoplasmic poly(A)-binding proteins (PABP)  
97 PABPC1 and PABPC4 among the highly enriched MKRN1 interactors (z-score > 4,  
98 corrected *P* values = 7.18e-10 and 6.16e-16, respectively) (**Fig. 1A**, **Supplemental**  
99 **Fig. S2A**, and **Supplemental Table S1**). Moreover, we detected 14 ribosomal proteins  
100 as well as four proteins that were previously shown to co-purify with ribosomes (Simsek  
101 et al. 2017), including IGF2BP1, LARP1, UPF1, and ELAVL1 (**Fig. 1A**). Consistently,  
102 “translation” was among the significantly enriched Gene Ontology (GO) terms for the  
103 MKRN1 interaction partners (Biological Process [BP], **Supplemental Fig. S2B**).  
104 Almost all interactors were previously found in association with polyadenylated  
105 transcripts (50 out of 53 proteins have been annotated with the GO term “poly(A) RNA  
106 binding”, Molecular Function [MF], **Supplemental Fig. S2B**). We confirmed the MS  
107 results in reciprocal AP experiments with GFP-tagged PABPC1, ELAVL1, and

108 IGF2BP1 as baits followed by Western blot for endogenous MKRN1 (**Supplemental**  
109 **Fig. S2C**). All detected interactions persisted in the presence of RNases (RNase A  
110 and T1), demonstrating that MKRN1 interacts with these proteins in an RNA-  
111 independent manner (**Supplemental Fig. S2C**). Together, these observations suggest  
112 that MKRN1 is part of a larger mRNA ribonucleoprotein particle (mRNP) together with  
113 PABP and other RBPs. This is further supported by a parallel study on the Mkrn1  
114 ortholog in *Drosophila melanogaster*, which consistently identified pAbp, Larp, Upf1  
115 and Imp (IGF2BP in mammals) as interaction partners (Dold et al, parallel submission;  
116 preprint available at bioRxiv, doi: 10.1101/501643).

117 Many proteins interact with PABP via a PABP-interacting motif (PAM2) motif, which  
118 specifically binds to the MLLE domain present almost exclusively in PABP (Deo et al.  
119 2001; Kozlov et al. 2010). Accordingly, a previous study demonstrated that MKRN1  
120 associates with PABP via a PAM2 motif at amino acid positions 161-193 (Miroci et al.  
121 2012). In support of a putative functional relevance, a phylogenetic analysis illustrated  
122 that the presence and positioning of the PAM2 motif are preserved in MKRN1 orthologs  
123 across metazoans (**Supplemental Fig. S1A,B**). AP of a MKRN1 variant with point  
124 mutations in the PAM2 motif (GFP-MKRN1<sup>PAM2mut</sup>) (Pohlmann et al. 2015) no longer  
125 recovered PABPC1 and PABPC4 (**Fig. 1B-D** and **Supplemental Table S1**). For  
126 comparison, we also tested a previously described point mutation in the RING domain  
127 that abolishes the E3 ubiquitin ligase function (ligase-dead, GFP-MKRN1<sup>RINGmut</sup>) (Kim  
128 et al. 2005). This mutation did not impair the interaction of MKRN1 with PABPC1, but  
129 led to a slight increase, possibly due to stabilisation of MKRN1 and/or PABPC1 (**Fig.**  
130 **1C, Supplemental Fig. S7, and Supplemental Table S1**). Surprisingly,  
131 MKRN1<sup>PAM2mut</sup> lost interaction not only with PABPC1 and PABPC4, but also with  
132 several other identified proteins (**Fig. 1D**), suggesting that MKRN1<sup>PAM2mut</sup> no longer

133 resided within the mRNPs. These results confirmed that MKRN1 interacts with PABP  
134 proteins, and suggested that this association is required for mRNP formation.

### 135 **MKRN1 binds to poly(A) tails and at internal A-stretches**

136 In order to characterise the RNA-binding behaviour of human MKRN1 *in vivo*, we  
137 performed individual-nucleotide resolution UV crosslinking and immunoprecipitation  
138 (iCLIP) (König et al. 2010) in combination with 4-thiouridine (4SU) labelling to enhance  
139 UV crosslinking (Hafner et al. 2010). In three replicate experiments with GFP-tagged  
140 MKRN1 (GFP-MKRN1<sup>wt</sup>) expressed in HEK293T cells, we identified more than 4,6  
141 million unique crosslink events, cumulating into 7,331 MKRN1 binding sites (see  
142 Materials and methods; **Supplemental Table S2**). These were further ranked  
143 according to the strength of MKRN1 binding, which was estimated from the enrichment  
144 of crosslink events within a binding site relative to its local surrounding, which served  
145 as a proxy for transcript abundance (“signal-over-background”, SOB; see Materials  
146 and Methods) (Sutandy et al. 2018). SOB values were highly reproducible between  
147 replicates (Pearson correlation coefficients  $r > 0.72$ , **Supplemental Fig. S3**).

148 Across the transcriptome, MKRN1 almost exclusively bound to protein-coding mRNAs  
149 with a strong tendency to locate in 3' UTRs (**Fig. 2A,E**). Binding sites generally  
150 harboured uridine-rich tetramers (**Supplemental Fig. S4A**), likely reflecting 4SU-  
151 based UV crosslinking (Hafner et al. 2010). Strikingly, the top 20% MKRN1 binding  
152 sites were massively enriched in AAAA tetramers (A, adenosine) within 5-50  
153 nucleotides (nt) downstream of the binding sites (**Fig. 2B** and **Supplemental Fig.**  
154 **S4A**). These were situated within A-rich stretches (A-stretches), which ranged from 8-  
155 30 nt in length (**Supplemental Fig. S4B**; see Materials and methods). Within 3' UTRs,  
156 30% (1,848 out of 6,165) of MKRN1 binding sites resided immediately upstream of an  
157 A-stretch (**Fig. 2C,E**) and longer A-stretches associated with stronger MKRN1 binding



158 **(Supplemental Fig. S4C,D)**. Intriguingly, we detected a requirement for a continuous  
159 run of at least 8 A's to confer strong MKRN1 binding (**Fig. 2D**), which precisely matched  
160 the RNA footprint of PABP (Webster et al. 2018). Since PABP was previously reported  
161 to also bind within 3' UTRs (Bag 2001; Lyabin et al. 2011; Kini et al. 2016), these  
162 observations indicated that MKRN1 binds together with PABP to mRNAs.

163 Prompted by this notion, we analysed the unusually high fraction of unmapped iCLIP  
164 reads in the MKRN1 dataset (**Supplemental Table S2**). In accordance with binding of  
165 MKRN1 immediately upstream of poly(A) tails, more than 13% of the unmapped reads  
166 displayed an increased A-content (**Fig. 3B**), compared to only 2% for an unrelated  
167 control RBP (Braun et al. 2018). In addition, the mapped GFP-MKRN1<sup>wt</sup> crosslink  
168 events were enriched upstream of annotated polyadenylation sites, as exemplified in  
169 the *SRSF4* gene (**Fig. 2E** and **Fig. 3A,C**). Together, these results support the notion  
170 that MKRN1 binds upstream of poly(A) tails, possibly in conjunction with PABP. In  
171 order to test whether PABP is required for MKRN1 binding, we performed UV  
172 crosslinking experiments with GFP-MKRN1<sup>PAM2mut</sup>, which no longer interacts with  
173 PABP (**Fig. 1C,D**). Strikingly, RNA binding of this mutant was globally reduced  
174 compared to GFP-MKRN1<sup>wt</sup> (**Fig. 3D** and **Supplemental Fig. S5**), indicating that  
175 PABP might recruit MKRN1 to RNA. In summary, these results strongly imply that  
176 MKRN1 binds upstream of poly(A) tails, which could be implemented via its interaction  
177 with PABP. In a concordant scenario, it was found that *Drosophila* Mkrn1 bound before  
178 an extended A-stretch in the 3' UTR of *oskar* mRNA, and that this binding was  
179 significantly reduced upon depletion of pAbp (Dold et al., parallel submission; preprint  
180 available at bioRxiv, doi: 10.1101/501643).

181 **MKRN1 promotes ribosome stalling at poly(A) sequences**

182 As outlined above, our iCLIP data evidenced that MKRN1 marks the beginning of  
183 poly(A) tails. Hence, it is conceivable that MKRN1 will also bind upstream of premature  
184 polyadenylation events within open reading frames. Based on MKRN1's binding  
185 pattern, its interaction partners and its previously reported association with ribosomes  
186 (Simsek et al. 2017), we hypothesised that MKRN1 may be involved in the clearance  
187 of such transcripts by ribosome-associated quality control (RQC). In this process,  
188 ribosomes that translate into a poly(A) sequence, for instance upon stop codon  
189 readthrough and premature polyadenylation, are stalled and eventually recycled  
190 (Brandman and Hegde 2016; Joazeiro 2017). To test this hypothesis, we employed a  
191 recently introduced flow cytometry-based assay that monitors ribosome stalling in a  
192 dual fluorescence reporter (Juszkiewicz and Hegde 2017) (**Fig. 4A**).

193 As reported previously, inserting a K(AAA)<sub>20</sub> linker (encoding for 20 lysine residues)  
194 into the reporter resulted in predominant ribosome stalling compared to the starting  
195 vector (K<sub>0</sub>, **Fig. 4B** and **Supplemental Fig. 6A**). Importantly, *MKRN1* depletion with  
196 two independent siRNA sequences led to a reproducible recovery of RFP expression  
197 downstream of K(AAA)<sub>20</sub>, demonstrating that many ribosomes failed to stall at  
198 K(AAA)<sub>20</sub> (*MKRN1* KD1 and KD2; **Fig. 4C** and **Supplemental Fig. S6A,B**). *MKRN1*  
199 KD2 seemed slightly more effective, possibly because this siRNA simultaneously  
200 decreased the transcript levels of the close paralogue *MKRN2* (**Supplemental Fig.**  
201 **S6C**). Notably, *MKRN1* KD2 impaired ribosome stalling to a similar level as KD of  
202 *ZNF598*, the E3 ubiquitin ligase that was recently reported to function in RQC (Garzia  
203 et al. 2017; Juszkiewicz and Hegde 2017; Sundaramoorthy et al. 2017). Moreover,  
204 simultaneous depletion of *MKRN1* and *ZNF598* was not additive, indicating that both  
205 proteins are necessary for function (**Fig. 4C** and **Supplemental Fig. S6A**). In addition,  
206 we noted a certain level of cross-regulation, such that *ZNF598* expression was

207 decreased in *MKRN1* KD1 (but not in *MKRN1* KD2), whereas *ZNF598* overexpression  
208 reduced *MKRN1* expression (**Supplemental Fig. S6D,E**). Taken together, we  
209 conclude that MKRN1 contributes to efficient ribosome stalling in RQC.

## 210 **MKRN1 mediates the ubiquitylation of ribosome-associated proteins**

211 RQC builds on a series of ubiquitylation events by multiple E3 ubiquitin ligases,  
212 including Listerin and ZNF598 (Brandman and Hegde 2016). In order to identify  
213 putative ubiquitylation substrates of MKRN1, we first determined the protein  
214 interactome of the ligase-deficient mutant GFP-MKRN1<sup>RINGmut</sup>. In three replicate  
215 experiments, we quantified 1,097 protein groups present in at least two out of three  
216 replicates (**Supplemental Table S1**), revealing 137 proteins that were significantly  
217 enriched compared to GFP-MKRN1<sup>wt</sup> (**Supplemental Fig. S7**). Intriguingly, these  
218 included RPS10, a ribosomal protein that was previously reported to be modified by  
219 ZNF598 during RQC (Garzia et al. 2017; Juskiewicz and Hegde 2017;  
220 Sundaramoorthy et al. 2017).

221 In order to directly test for ubiquitylation of putative substrates of MKRN1, we  
222 performed ubiquitin remnant profiling to compare the relative abundance of di-glycine-  
223 modified lysines in wild type and *MKRN1* KD cells. We quantified 2,324 ubiquitylation  
224 sites (in 1,264 proteins) that were detected in all four replicate experiments  
225 (**Supplemental Table S3**). Notably, *MKRN1* depletion led to a significantly decreased  
226 abundance of 29 ubiquitylation sites on 21 proteins (FDR < 10%, **Fig. 5A**). The majority  
227 of the ubiquitylation targets assembled into a coherent cluster of translational  
228 regulators based on previously reported protein-protein interactions and functional  
229 annotations (**Fig. 5B,C** and **Supplemental Fig. 8A**). Among these proteins, we had  
230 already detected PABPC1/4, IGF2BP1, ELAVL1, MOV10, LARP1, and RPS10 as  
231 significant interactors of GFP-MKRN1<sup>wt</sup> and/or GFP-MKRN1<sup>RINGmut</sup> (**Fig. 1A, Fig. 5F**

232 and **Supplemental Fig. S7**). Importantly, we detected a significant decrease in  
233 ubiquitylation at lysine 107 of RPS10 (K107; **Fig. 5D**). In order to distinguish differential  
234 ubiquitylation from protein level changes, we also measured the total protein levels in  
235 *MKRN1* KD cells and did not observe changes in RPS10, PABPC1/4, IGF2BP1/2/3,  
236 ELAVL1, and MOV10 protein levels (**Supplemental Fig. 8B** and **Supplemental Table**  
237 **S4**). Taken together, we conclude that MKRN1 mediates ubiquitylation of the ribosomal  
238 protein RPS10 and several translational regulators during ribosome-associated quality  
239 control.

## 240 **Discussion**

241 Ribosome-associated quality control is essential to recognise and clear terminally  
242 stalled ribosomes. Here, we uncover MKRN1 as a novel factor in RQC. Our data  
243 indicate that MKRN1 is positioned upstream of poly(A) sequences through direct  
244 interaction with PABP, thereby marking the beginning of poly(A) tails. We propose that  
245 in case of premature polyadenylation, MKRN1 stalls the translating ribosome and  
246 initiates RQC by ubiquitylating ribosomal protein RPS10, PABP and other translational  
247 regulators (**Fig. 6**).

### 248 **PABP recruits MKRN1 upstream of A-stretches and poly(A) tails**

249 Central to our model is the specific RNA-binding behaviour of MKRN1, which is  
250 recruited to mRNA by PABP to mark the beginning of poly(A) tails. This builds on the  
251 following observations: (i) We and others show that MKRN1 and PABP interact via the  
252 PAM2 motif (Miroci et al. 2012). (ii) MKRN1 binding to RNA is strongly reduced when  
253 interaction with PABP is abolished. (iii) The association of strong MKRN1 binding with  
254 continuous A-runs of  $\geq 8$  A's mirrors the footprint of one RNA recognition motif (RRM)  
255 domain of PABP, indicating that the binding of one RRM to poly(A) is sufficient for

256 MKRN1 recruitment (Webster et al. 2018). On such short A-stretches, MKRN1 might  
257 stabilise PABP binding, while on longer A-stretches, PABP might be the major driving  
258 force to recruit MKRN1. This interaction might also anchor the first PABP at the  
259 beginning of the poly(A) tail. One possible function could be the stabilisation of PABP  
260 on short poly(A) tails to promote efficient translation (Lima et al. 2017). In yeast, where  
261 a MKRN1 ortholog is missing (see below), this anchoring is thought to be achieved by  
262 Pab1p itself via its fourth RRM domain (Webster et al. 2018). Of note, a parallel study  
263 with the Mkrn1 ortholog from *D. melanogaster* demonstrates binding of a Mkrn1/pAbp  
264 complex at an A-stretch in the 3' UTR of *oskar* mRNA, which is involved in translational  
265 control and required for oogenesis (Dold et al., parallel submission; preprint available  
266 at bioRxiv, doi: 10.1101/501643).

### 267 **MKRN1 ubiquitylates RPS10 and translational regulators to stall ribosomes**

268 Our data suggest that ribosomes encountering the MKRN1-PABP complex are stalled,  
269 possibly via ubiquitylation of RPS10 and other MKRN1 interactors. Concordantly,  
270 ZNF598, a factor that was recently shown to function in RQC, was also found to  
271 mediate ubiquitylation of RPS10 (Juszkiewicz et al. 2018). In conjunction with its  
272 unique RNA-binding behaviour, we therefore hypothesise that MKRN1 acts as a first  
273 line of defence against poly(A) translation. We propose that MKRN1 is recruited by  
274 PABP to the beginning of poly(A) tails, including premature polyadenylation events  
275 within open reading frames, where it represents a physical "roadblock" to the  
276 translating ribosome. Upon contact with the translating ribosome, MKRN1 ubiquitylates  
277 K107 on RPS10, thereby stalling the ribosome before it translates the poly(A) tail.  
278 Subsequently, the trailing ribosomes collide with the initially stalled ribosome. ZNF598  
279 recognises the collision interface and ubiquitylates the collided ribosomes (Simms et  
280 al. 2017; Juszkiewicz et al. 2018). In summary, we suggest that a sequence of MKRN1-

281 mediated and ZNF598-mediated ubiquitylation events on ribosomal proteins and  
282 possibly other factors, including PABPC1, triggers ribosome-associated quality control.

### 283 **Differences between human and yeast RQC explain the requirement for MKRN1**

284 Many known components of the RQC machinery, such as Listerin (Ltn1p in yeast) and  
285 ZNF598 (Hel2p in yeast), are identical from yeast to human, however the molecular  
286 signals that are recognised differ partially. In yeast, RQC can be triggered by an excess  
287 of positively charged amino acids (lysine and arginine), which are sensed while they  
288 pass through the ribosomal exit tunnel (Lu and Deutsch 2008; Letzring et al. 2013). In  
289 contrast, in human, sensing the aberrant mRNAs does not occur via the encoded  
290 amino acids but at the level of the mRNA sequence and corresponding tRNAs, such  
291 that only poly(A) effectively results in ribosome stalling (Arthur et al. 2015; Garzia et al.  
292 2017; Juskiewicz and Hegde 2017). We propose that MKRN1 acts as direct reader  
293 of poly(A) sequences based on its interaction with PABP. Consistent with this  
294 conceptual difference, there is no functionally equivalent ortholog of MKRN1 in yeast  
295 (Yth1p and Lee1p are similar, but lack RING domain and PAM2 motif; **Supplemental**  
296 **Fig. 1C**). Why yeast and human employ partially different mechanisms to detect  
297 poly(A) translation is currently unclear, but it has been suggested that spurious  
298 translation of poly-lysine stretches from long human poly(A) tails might target the  
299 aberrant proteins to the nucleus (Juskiewicz and Hegde 2017). Loss of mRNA  
300 surveillance and RQC deficiency can lead to protein aggregation and culminate in  
301 proteotoxic stress, which in turn is linked to neurological disorders such as amyotrophic  
302 lateral sclerosis (Choe et al. 2016; Jamar et al. 2018). Hence, recognition of poly(A)  
303 sequences prior to their translation might be particularly beneficial in humans.

## 304 **Materials and methods**

### 305 **Cell culture**

306 HEK293T cells were obtained from DSMZ and cultured in DMEM (Life Technologies)  
307 with 10% fetal bovine serum (Life Technologies), 1% penicillin/streptomycin (Life  
308 Technologies), and 1% L-glutamine (Life Technologies). All cells were maintained at  
309 37°C in a humidified incubator containing 5% CO<sub>2</sub> and routinely tested for mycoplasma  
310 infection. For SILAC labelling, cells were maintained in media containing either L-  
311 arginine and L-lysine (light SILAC label), L-arginine (<sup>13</sup>C<sub>6</sub>) and L-lysine (<sup>2</sup>H<sub>4</sub>) (medium  
312 SILAC label), or L-arginine (<sup>13</sup>C<sub>6</sub>-<sup>15</sup>N<sub>4</sub>) and L-lysine (<sup>13</sup>C<sub>6</sub>-<sup>15</sup>N<sub>2</sub>) (heavy SILAC label)  
313 (Cambridge Isotope Laboratories).

### 314 **Vectors**

315 The following vectors, suitable for Gateway Cloning, were obtained either from the IMB  
316 Core Facility ORFeome Collection (Collaboration 2016) or from the Harvard PlasmID  
317 Repository (<https://plasmid.med.harvard.edu/PLASMID/>): pENTR221-MKRN1,  
318 pENTR221-PABPC1, pENTR223.1-IGF2BP1, pENTR221-ELAVL1, pCMV-SPORT-  
319 ZNF598. Coding sequences from the entry vectors were cloned into the mammalian  
320 expression vectors pMX-DEST53-IP-GFP by LR Gateway cloning according to the  
321 manufacturer's recommendations (Gateway LR Clonase II Enzyme mix; Life  
322 Technologies). Dual fluorescence reporter plasmids (pmGFP-P2A-K<sub>0</sub>-P2A-RFP,  
323 pmGFP-P2A-(K<sup>AAA</sup>)<sub>12</sub>-P2A-RFP, pmGFP-P2A-(K<sup>AAA</sup>)<sub>20</sub>-P2A-RFP, and pmGFP-P2A-  
324 (R<sup>CGA</sup>)<sub>10</sub>-P2A-RFP) were generously provided by Ramanujan S. Hegde (MRC  
325 Laboratory of Molecular Biology, Cambridge, UK) (Juszkiewicz and Hegde 2017).

### 326 **Cloning**

327 All MKRN1 mutant plasmids were generated with the Q5 Site-Directed Mutagenesis  
328 Kit (NEB) according to the manufacturer's recommendations. In order to disrupt

329 MKRN1's interaction with PABP (MKRN1<sup>PAM2mut</sup>), three point mutations were  
330 introduced into the PAM2 motif (A169S, F172A, P174A; **Fig. 1B**) as previously  
331 described (Pohlmann et al. 2015). In MKRN1<sup>RINGmut</sup>, a previously described mutation  
332 in the RING domain (H307E) was introduced to abolish E3 ubiquitin ligase function  
333 (Kim et al. 2005). All primers used for introducing mutations into MKRN1 are listed in  
334 **Supplemental Table S5**.

### 335 **Transfections**

336 Overexpression of vectors was performed using Polyethylenimine MAX 4000  
337 (Polysciences, 24885-2) with a DNA:PEI ratio of 1:10. Knockdowns were performed  
338 with siRNAs (**Supplemental Table S6**) using Lipofectamine RNAiMAX (Life  
339 Technologies) according to the manufacturer's recommendations.

### 340 **Affinity purification (AP) for Western blot analyses**

341 GFP-based affinity purifications (APs) were performed as described before  
342 (Hildebrandt et al. 2017). In brief, HEK293T cells transiently expressing GFP (empty  
343 vector) or a GFP-tagged target protein were used. The cells were lysed in modified  
344 RIPA (mRIPA) buffer supplemented with protease inhibitors (protease inhibitor  
345 cocktail, Sigma), 1 mM sodium orthovanadate, 5 mM  $\beta$ -glycerophosphate, 5 mM  
346 sodium fluoride, and 10 mM N-ethylmaleimide (NEM) (all from Sigma). Protein  
347 concentrations were determined using the Pierce BCA Protein Assay Kit (Thermo  
348 Fisher). GFP-trap agarose beads (Chromotek) were incubated with the cleared lysate  
349 for 1 h at 4°C. After five washes with mRIPA buffer, the beads were resuspended in  
350 LDS sample buffer (Life Technologies) and heated to 70°C for 10 min. For RNase  
351 digests, the enriched proteins were incubated with 0.5 U/ $\mu$ l RNase A (Qiagen) and  
352 20 U/ $\mu$ l RNase T1 (Thermo Fisher Scientific) for 30 min at 4°C after the first two washes  
353 in mRIPA buffer.



### 354 **Sample preparation for the protein interactome analysis**

355 GFP-based APs were performed as described before (Hildebrandt et al. 2017). In brief,  
356 HEK293T cells transiently expressing GFP (empty vector) were cultured in light SILAC  
357 medium, while cells expressing N-terminally GFP-tagged MKRN1 wt or mutants were  
358 cultured in medium or heavy SILAC medium. The cells were lysed as described above.  
359 After washing in mRIPA buffer, GFP-trap agarose beads were incubated with the  
360 cleared lysate for 1 h at 4°C. All AP samples were washed four times with mRIPA  
361 buffer, combined and washed again in mRIPA buffer. The beads were heated in LDS  
362 sample buffer, supplemented with 1 mM dithiothreitol (DTT; Sigma, D5545) for 10 min  
363 at 70°C and alkylated using 5.5 mM 2-chloroacetamide (CAA; Sigma, C0267) for 30  
364 min at RT in the dark (Nielsen et al. 2008).

### 365 **Sample preparation for the proteome analysis**

366 *MKRN1* KD using siRNA2 was performed in heavy labelled SILAC cells and control  
367 KD was performed in light labelled SILAC cells in two replicates. For the third replicate,  
368 a label swop was performed, knocking down *MKRN1* (siRNA2) in light labelled SILAC  
369 cells and control in heavy labelled SILAC cells. For proteome analysis, cells were lysed  
370 as described above. Subsequently, 25 µg protein from each SILAC condition (50 µg in  
371 total) were pooled and processed as described below.

### 372 **Sample preparation for mass spectrometry**

373 The enriched proteins were resolved by SDS-PAGE on a NuPAGE 4-12% Bis-Tris  
374 protein gel (Thermo Fisher Scientific) and stained using the Colloidal Blue Staining Kit  
375 (Life Technologies). Proteins were in-gel digested using trypsin, before peptides were  
376 extracted from the gel. To concentrate, clear and acidify the peptides, they were bound  
377 to C18 StageTips as described previously (Rappsilber et al. 2007).

## 378 **Mass spectrometry data acquisition**

379 Peptide fractions were analysed on a quadrupole Orbitrap mass spectrometer (Thermo  
380 Q Exactive Plus, Thermo Scientific) coupled to an uHPLC system (EASY-nLC 1000,  
381 Thermo Scientific) (Michalski et al. 2011). Peptide samples were separated on a C18  
382 reversed phase column (length: 20 cm, inner diameter: 75  $\mu\text{m}$ , bead size: 1.9  $\mu\text{m}$ ) and  
383 eluted in a linear gradient from 8 to 40% acetonitrile containing 0.1% formic acid in 105  
384 min for the interactome analyses, in 175 min for the proteome analyses, or in 125 min  
385 for the ubiquitylome analyses. The mass spectrometer was operated in data-  
386 dependent positive mode, automatically switching between MS and MS<sup>2</sup> acquisition.  
387 The full scan MS spectra (m/z 300–1650) were acquired in the Orbitrap. Sequential  
388 isolation and fragmentation of the ten most abundant ions was performed by higher-  
389 energy collisional dissociation (HCD) (Olsen et al. 2007). Peptides with unassigned  
390 charge states, as well as with charge states less than +2 were excluded from  
391 fragmentation. The Orbitrap mass analyser was used for acquisition of fragment  
392 spectra.

## 393 **Peptide identification and quantification**

394 Raw data files were analysed and peptides were identified using the MaxQuant  
395 software (version 1.5.28) (Cox et al. 2009). Parent ion and MS<sup>2</sup> spectra were compared  
396 to a database containing 92,578 human protein sequences obtained from UniProtKB  
397 (release June 2018), coupled to the Andromeda search engine (Cox et al. 2011).  
398 Cysteine carbamidomethylation was set as a fixed modification. N-terminal acetylation,  
399 oxidation, and N-ethylmaleimide (NEM) were set as variable modifications. For  
400 ubiquitylome data analysis, glycine-glycine (GlyGly) modification of lysine was  
401 additionally set as a variable modification. The mass tolerance for the spectra search  
402 was set to be lower than 6 ppm in MS and 20 ppm in HCD MS<sup>2</sup> mode. Spectra were

403 searched with strict trypsin specificity and allowing for up to three mis-cleavages. Site  
404 localisation probabilities were determined by MaxQuant using the PTM scoring  
405 algorithm as described previously (Elias and Gygi 2007; Cox and Mann 2008). Filtering  
406 of the dataset was based on the posterior error probability to arrive at a false discovery  
407 rate (FDR) < 1% estimated using a target-decoy approach. Proteins that were  
408 categorised as “only identified by site”, potential contaminants and reverse hits were  
409 removed. Only proteins identified with at least two peptides (including at least one  
410 unique peptide) and a SILAC ratio count of at least two were used for analysis. For AP  
411 experiments, proteins that were quantified in at least two out of three experiments were  
412 kept for further analysis. In total, we quantified 1,106 and 1,097 protein groups in the  
413 AP experiments with GFP-MKRN1<sup>wt</sup> (**Fig. 1A**), GFP-MKRN1<sup>PAM2mut</sup> (**Fig. 1D**) and  
414 GFP-MKRN1<sup>RINGmut</sup> (**Supplemental Fig. S7**), respectively (**Supplemental Table S1**).  
415 The SILAC ratios were log<sub>2</sub> transformed and converted into an asymmetric z-score  
416 based on the mean and interquartile range of the distribution as described previously  
417 (Cox and Mann 2008). For statistical analysis, a moderated t-test from the limma  
418 algorithm was used (Ritchie et al. 2015). Enriched proteins with an FDR < 5% were  
419 determined to be significantly enriched interactors (for GFP-MKRN1<sup>wt</sup>). For proteins  
420 enriched in GFP-MKRN1<sup>RINGmut</sup> over GFP-MKRN1<sup>wt</sup>, proteins with an FDR < 5% and  
421 a GFP-MKRN1<sup>wt</sup>/GFP z-score > 1 were selected. In the proteome experiment, we  
422 quantified 6,439 protein groups, present in all three replicates. Ratio-ratio and ratio-  
423 intensity plots were created in R (version 3.4.3) using RStudio  
424 (<http://www.rstudio.com/>).

#### 425 **Functional annotation of MKRN1 interactors and MKRN1-ubiquitylation targets.**

426 In order to assess the functions of MKRN1-interacting proteins and proteins with  
427 MKRN1-dependent ubiquitylation sites, we performed gene ontology (GO) enrichment

428 analyses using the Database for Annotation, Visualization and Integrated Discovery  
429 (DAVID 6.7) for three GO domains (Jiao et al. 2012). Enriched GO terms (modified  
430 Fisher exact test, adjusted  $P$  value < 0.05, Benjamini-Hochberg correction;  
431 **Supplemental Fig. S2B, S8A**) were visualised using REVIGO (Reduce & Visualize  
432 Gene Ontology) allowing medium GO term similarity (Supek et al. 2011).

### 433 **Western blot**

434 Denatured proteins were separated by SDS-PAGE on a NuPAGE 4-12% Bis-Tris  
435 protein gel (Life Technologies) and transferred to a 0.45  $\mu$ m nitrocellulose membrane  
436 (VWR). For detection, either fluorophore-coupled secondary antibodies or HRP-  
437 conjugated secondary antibodies and WesternBright Chemiluminescent Substrate  
438 (Biozym Scientific) or SuperSignal West Pico Chemiluminescent Substrate (Life  
439 Technologies) were used. Western blots were quantified by determining the  
440 background-subtracted densities of the protein of interest using ImageJ (Schindelin et  
441 al. 2015). The signal from the AP (against GFP-tagged protein of interest) was  
442 normalised to the respective control samples expressing the empty vector or to the  
443 input.

### 444 **Antibodies**

445 The following antibodies were used: anti-GFP (B-2 clone; Santa Cruz; sc-9996), anti-  
446 MKRN1 (Bethyl Laboratories, A300-990A), anti-PABPC1/3 (Cell Signaling, 4992), anti-  
447 Znf598 (N1N3; GeneTex; GTX119245), anti- $\alpha$ Tubulin (Sigma Aldrich, T-5168), anti-  
448 Rabbit IgG (Cell Signaling; 7074), anti-Mouse IgG (Cell Signaling; 7076), IRDye®  
449 680RD Goat anti-Mouse IgG (P/N 925-68070), and IRDye® 800CW Goat anti-Rabbit  
450 IgG (P/N 925-32211) (both LI-COR Biosciences GmbH).

## 451 **RNA isolation, cDNA synthesis and qPCR**

452 Cells were washed twice in ice-cold PBS and harvested. RNA was isolated using the  
453 RNeasy Plus Mini Kit (Qiagen) according to the manufacturer's recommendations.  
454 500 ng total RNA was transcribed into cDNA using random hexamer primers (Thermo  
455 Scientific) and the RevertAid Reverse Transcriptase (Thermo Scientific) according to  
456 the manufacturer's recommendations. qPCR was performed using the Luminaris  
457 HiGreen qPCR Master Mix, low ROX (Thermo Scientific) according to the  
458 manufacturer's recommendations with 10  $\mu$ M forward and reverse primers  
459 **(Supplemental Table S5).**

## 460 **iCLIP experiments and data processing**

461 iCLIP libraries were prepared as described previously (Huppertz et al. 2014; Sutandy  
462 et al. 2016). HEK293T cells ectopically expressing either GFP alone (empty vector) or  
463 N-terminally GFP-tagged MKRN1 wild type (GFP-MKRN1<sup>wt</sup>), GFP-MKRN1<sup>PAM2mut</sup>, or  
464 GFP-MKRN1<sup>RINGmut</sup> were used. For crosslinking, confluent cells were irradiated once  
465 with 150 mJ/cm<sup>2</sup> at 254 nm in a Stratalinker 2400 or treated with 4-thiouridine (100  $\mu$ M  
466 for 16 h) and irradiated with 3x 300 mJ/cm<sup>2</sup> in a Stratalinker 2400 with 365 nm bulbs.  
467 For IP, 10.5  $\mu$ g anti-GFP antibody (goat, Protein Unit, MPI-CBG, Dresden) were used  
468 per sample. The libraries were sequenced as 50-nt single-end reads on an Illumina  
469 MiSeq platform **(Supplemental Table S2).**

470 Basic sequencing quality checks were applied to all reads using FastQC (version  
471 0.11.5) (<https://www.bioinformatics.babraham.ac.uk/projects/fastqc/>). Afterwards,  
472 reads were filtered based on sequencing qualities (Phred score) of the barcode region.  
473 Only reads with at most one position with a sequencing quality < 20 in the experimental  
474 barcode (positions 4 to 7) and without any position with a sequencing quality < 17 in  
475 the random barcode (positions 1-3 and 8-9) were kept for further analysis. Remaining

476 reads were de-multiplexed based on the experimental barcode on positions 4 to 7  
477 using Flexbar (version 3.0.0) (Dodt et al. 2012) without allowing mismatches.

478 All following steps of the analysis were performed on all individual samples after de-  
479 multiplexing. Remaining adapter sequences were trimmed from the right end of the  
480 reads using Flexbar (version 3.0.0) allowing up to one mismatch in 10 nt, requiring a  
481 minimal overlap of 1 nt of read and adapter. After trimming off the adapter, the barcode  
482 is trimmed off of the left end of the reads (first 9 nt) and added to the header of the  
483 read, such that the information is kept available for downstream analysis. Reads  
484 shorter than 15 nt were removed from further analysis.

485 Trimmed and filtered reads were mapped to the human genome (assembly version  
486 GRCh38) and its annotation based on GENCODE release 25 (Harrow et al. 2012)  
487 using STAR (version 2.5.4b) (Dobin et al. 2013). When running STAR, up to two  
488 mismatches were allowed, soft-clipping was prohibited and only uniquely mapping  
489 reads were kept for further analysis.

490 Following mapping, duplicate reads were marked using the dedup function of bamUtil  
491 (version 1.0.13), which defines duplicates as reads whose 5' ends map to the same  
492 position in the genome (<https://github.com/statgen/bamUtil>). Subsequently, marked  
493 duplicates with identical random barcodes were removed since they are considered  
494 technical duplicates, while biological duplicates showing unequal random barcodes  
495 were kept.

496 Resulting bam files were sorted and indexed using SAMtools (version 1.5) (Li et al.  
497 2009). Based on the bam files, bedgraph files were created using bamToBed of the  
498 BEDTools suite (version 2.25.0) (Quinlan and Hall 2010), considering only the position  
499 upstream of the 5' mapping position of the read, since this nucleotide is considered as

500 the crosslinked nucleotide. bedgraph files were then transformed to bigWig file format  
501 using bedGraphToBigWig of the UCSC tool suite (Kent et al. 2010).

## 502 **Identification and characterisation of MKRN1 binding sites**

503 Peak calling was performed on merged iCLIP coverage tracks (crosslink events per  
504 nucleotide) from the three replicates based on GENCODE annotation (release 27,  
505 GRCh38) using ASPeak (version 2.0; default setting plus `-nornaseq` to estimate  
506 parameters  $p$  and  $r$  for the negative binomial distributions in a 500-nt window around  
507 each peak) (Kucukural et al. 2013). The initially predicted peaks were resized to  
508 uniform 9-nt windows around their weighted centred as defined by ASPeak. To avoid  
509 artefacts, we removed sparsely covered peaks that harbour crosslink events on less  
510 than three nucleotides within the 9-nt region window. We iteratively merged all  
511 remaining windows if overlapping by at least 1 nt, by defining the position with the  
512 cumulative half maximum count of crosslink events as new window centre. We further  
513 kept only reproducible windows with at least three crosslink events from any two  
514 replicates. Finally, we excluded all windows overlapping with none or multiple protein-  
515 coding genes (GENCODE annotations support level  $\geq 2$  and transcript support level  $\geq$   
516 3), and assign each binding site to a distinct genomic region (3' UTR, 5' UTR, CDS,  
517 intron). Consistent with the mostly cytoplasmic localisation of MKRN1 (Miroci et al.  
518 2012; Cassar et al. 2015; Hildebrandt et al. 2017), less than 6% of the binding sites  
519 were predicted within introns, which were excluded from further analysis. This  
520 procedure yielded a total of 7,331 MKRN1 binding sites in 2,163 genes.

521 In order to estimate binding site strength and to facilitate comparisons between binding  
522 sites (**Fig. 2B,D** and **Supplemental Fig. 3D-F, 4A,C,D**), we corrected for transcript  
523 abundance by representing the crosslink events within a binding site as a 'signal-over-  
524 background' ratio (SOB). The respective background was calculated as the sum of

525 crosslink events outside of binding sites (plus 5 nt to either side) by the merged length  
526 of all exons. 3' UTR lengths were restricted to 10 nt past the last MKRN1 binding site  
527 or 500 nt if no binding site was present. SOB calculations were performed separately  
528 for each replicate and then averaged. No SOB value was assigned for genes with a  
529 background of < 10 crosslink events, resulting in SOB values for 97% of all binding  
530 sites.

531 In order to assess the local RNA sequence context of MKRN1 binding sites (**Fig. 2B**  
532 and **Supplemental Fig. S4A**), enriched 4-mers were counted inside the 9-nt binding  
533 sites as well as within 40-nt before and after. To estimate an empirical background  
534 distribution, 1,000 9-nt windows were randomly picked in 3' UTRs and 4-mer  
535 frequencies were counted in the same windows. This process was repeated 100 times,  
536 and the resulting mean and standard deviation were used to calculate the z-score for  
537 each 4-mer.

538 In order to define the A-rich regions downstream of MKRN1 binding sites in 3' UTRs  
539 (A-rich stretches), we used a maximisation approach in a 55-nt search space starting  
540 from the binding site centre. Within this space, we calculated the percentage of A  
541 nucleotides (A-content) for windows of increasing size (8-30 nt) and selected the  
542 stretch with highest value for each window size. In case of ties, the window closer to  
543 the binding site was preferred, resulting in a set of 23 candidate A-stretches with the  
544 maximal A-content for each length. Next, we computed the longest continuous A run  
545 (LCA) and a weighted A-content (multiplying the A-content with the number of A  
546 nucleotides) for each candidate A-stretch. Candidate A-stretches with an A-content <  
547 70%, a weighted A-content < 11 and an LCA < 4 were excluded. The final A-stretch  
548 for each binding site was then selected in a hierarchical manner, preferring LCA over  
549 weighted A-content. Lastly, overlapping A-stretches of neighbouring binding sites were



550 merged by selecting the highest scoring A-stretch, based on LCA and weighted A-  
551 content. In total, this procedure identified 1,412 non-overlapping A-stretches,  
552 associated with 1,848 binding sites.

553 In order to estimate the extent of MKRN1 binding to poly(A) tails (**Fig. 3B**), we  
554 evaluated the percentage of adenosine within the iCLIP reads that could not be  
555 mapped to the human genome without soft-clipping (see above). iCLIP data for  
556 heterogeneous nuclear ribonucleoprotein H (HNRNPH) served as control (Braun et  
557 al. 2018). Annotated transcript 3' ends (i.e. polyadenylation sites) were taken from  
558 GENCODE (all annotated protein-coding transcripts with support level  $\leq 2$  and  
559 transcript support level  $\leq 3$ ; release 28, GRCh38.p12; [www.gencodegenes.org](http://www.gencodegenes.org)). For  
560 **Fig. 3C**, all crosslink events within a 2-kb window around the polyadenylation sites  
561 for 3' UTR longer than 1 kb were counted.

### 562 **Evolutionary characterisation of Makorin protein family**

563 Four different ortholog searches were performed using HaMStR-OneSeq (Ebersberger  
564 et al. 2014) against the Quest for Orthologs Consortium protein set, containing 78  
565 species (release 2017\_04) (Sonnhammer et al. 2014). For each run, a different seed  
566 protein was chosen: human MKRN1-3 (UniProt identifiers Q9UHC7, Q9H000 and  
567 Q13064) and MKRN4 from zebrafish (A9C4A6). In order to identify proteins with a  
568 similar domain architecture, we calculated a unidirectional feature architecture  
569 similarity (FAS) score which compares the domain architecture of the seed protein and  
570 the predicted ortholog (Koestler et al. 2010). Predicted orthologues with FAS  $< 0.7$   
571 were removed after initial assessment. Finally, all vertebrate species and selected  
572 invertebrate species were used for reconstruction of a maximum likelihood (ML) tree.  
573 For this, protein sequences were aligned using MAFFT v7.294b L-INS-i (Kato and  
574 Standley 2013), and ML trees with 100 bootstrap replicates were calculated using

575 RAXML version 8.1.9 (Stamatakis 2014). Settings for a rapid bootstrap analysis and  
576 searching for the best scoring ML tree in one program run (-f a) and an automatic  
577 selection of the best fitting amino acid substitution model (-m PROTGAMMAAUTO)  
578 were chosen. Reconstructed trees were visualised using FigTree v1.4.2  
579 (<http://tree.bio.ed.ac.uk/software/figtree/>).

580 The phylogenetic tree and FASTA sequences from the ortholog dataset were loaded  
581 into DoMosaics (<http://www.domosaics.net>) and Pfam domains were annotated with  
582 HMMER (<http://hmmer.org/>, default parameters). Since the PAM2 motif in all Makorin  
583 proteins differs from the described consensus motif (Albrecht and Lengauer 2004), a  
584 custom Hidden Markov Model was trained on PAM2 motifs from selected Makorin  
585 orthologs and used for a HMMER scan of the orthologs (no E-value cutoff). The same  
586 procedure was repeated for the PAM2-like motif (PAM2L) (Pohlmann et al. 2015).

#### 587 **Dual fluorescence translation stall assay via flow cytometry**

588 Knockdowns were performed for 24 h, before the dual fluorescence reporter plasmids  
589 were ectopically expressed for 48 h. Cells were washed in PBS and trypsinised. After  
590 sedimentation, cells were resuspended in DPBS supplemented with 2 mM EDTA.  
591 Cellular GFP and RFP fluorescence was measured using flow cytometry on a  
592 LSRFortessa SORP (BD Biosciences). Data analysis was done using FlowJo (v10)  
593 (FlowJo, LLC). For statistical testing, paired two-tailed Student's t-tests with Benjamini-  
594 Hochberg correction were performed on  $n \geq 6$  replicates.

#### 595 **Ubiquitin remnant profiling**

596 Di-glycine remnant profiling was performed as described before (Wagner et al. 2011;  
597 Heidelberger et al. 2018). In four different experiments, isotope labels were assigned  
598 as follows: experiment 1, *MKRN1* KD1 (siRNA1), *MKRN1* KD2 (siRNA2) and control  
599 siRNA with light, medium and heavy SILAC labels, respectively; experiment 2, *MKRN1*

600 KD2 (siRNA2) and control siRNA with heavy and light SILAC labels, respectively;  
601 experiment 3, *MKRN1* KD2 (siRNA2) and control siRNA with heavy and light SILAC  
602 labels, respectively; experiment 3, *MKRN1* KD2 (siRNA2) and control siRNA with light  
603 and heavy SILAC labels, respectively. Cells were treated with the proteasome  
604 inhibitors bortezomib (1  $\mu$ M, 8h, replicate 1; Santa Cruz Biotechnology) or MG132 (10  
605  $\mu$ M, 2 h, replicates 2, 3, 4; Sigma). Proteins were precipitated in acetone. Proteins  
606 were digested with endoproteinase Lys-C (Wako Chemicals) and sequencing-grade  
607 modified trypsin (Sigma). To purify the peptides, reversed-phase Sep-Pak C18  
608 cartridges (Waters) were used. Modified peptides were enriched using di-glycine-  
609 lysine antibody resin (Cell Signaling Technology). The enriched peptides were eluted  
610 with 0.15% trifluoroacetic acid in water, then fractionated using micro-column-based  
611 strong-cation exchange chromatography (SCX) (Weinert et al. 2013) before being  
612 desalted on reversed-phase C18 StageTips (Rappsilber et al. 2007). Samples were  
613 analysed by quantitative mass spectrometry and MaxQuant as described above. To  
614 identify significantly regulated ubiquitylation sites, the limma algorithm was applied  
615 (Ritchie et al. 2015). A  $P$  value  $< 0.1$  after multiple testing correction was used as a  
616 cut-off to determine up- and downregulated ubiquitylation sites. Volcano and dot plots  
617 were created in R (version 3.4.3).

### 618 **Functional interaction network of MKRN1 ubiquitylation target proteins**

619 The functional protein interaction network analysis was performed by integrating  
620 interaction data from the STRING database (score  $> 0.4$ ), the BioGrid database and  
621 our own findings (Franceschini et al. 2013; Chatr-Aryamontri et al. 2017). Cytoscape  
622 (version 3.6.1) was used to visualise the protein interaction network (Saito et al. 2012).

623

624

625 **Availability of data and materials**

626 The mass spectrometry proteomics data have been deposited to the  
627 ProteomeXchange Consortium (<http://proteomecentral.proteomexchange.org>) via the  
628 PRIDE partner repository with the dataset identifier PXD011772.

629 Raw and processed iCLIP data are available at GEO under the accession number  
630 GSE122869.

631 **Acknowledgements**

632 We would like to thank all members of the Zarnack, König and Beli labs, as well as  
633 René Ketting, Nadine Wittkopp, and Miguel Almeida for fruitful discussions. The  
634 authors gratefully thank the Ramanujan S. Hegde for providing the dual fluorescence  
635 reporter plasmids. We thank Anja Freiwald for assistance with mass spectrometry  
636 analysis and Dr. Stefan Simm for assistance with evaluating PAM2 mutations. The  
637 support of the IMB Core Facilities Bioinformatics, Flow Cytometry, Genomics, and the  
638 use of its Illumina MiSeq, as well as the DFG-funded Mass Spectrometer Q Exactive  
639 Plus (INST 247/766-1 FUGG) are gratefully acknowledged. K.Z. was supported by the  
640 LOEWE program Ubiquitin Networks (Ub-Net) of the State of Hesse (Germany) and  
641 the SFB 902 of the German Research Foundation. P.B. is supported by the Emmy  
642 Noether Program (BE 5342/1-1), the SFB 1177 of the German Research Foundation  
643 and the Marie Curie Career Integration Grant from the European Commission (grant  
644 agreement number: 630763). The project was funded by the German Research  
645 Foundation (DFG) as part of SPP1925 to J.-Y.R. (RO 4681/4-1) and J.K. (KO 4566/3-  
646 1). Animal shapes in Supplemental Fig. S1A were obtained from PhyloPic and are  
647 used under the Creative Commons Attribution-NonCommercial-ShareAlike 3.0  
648 Unported license.

649 **Author contributions**

650 A.H. performed iCLIP experiments, flow cytometry measurements of dual fluorescence  
651 reporters and most proteomics experiments. M.B. performed most bioinformatics  
652 analyses of MKRN1 iCLIP data. C.R. analysed MKRN1 binding at polyadenylation  
653 sites and poly(A) tails. A.B. and S.B. performed initial iCLIP data processing and  
654 analysis. A.H. and A.B. analysed the proteomics data. J.B.H. and A.V. contributed to  
655 replicate ubiquitin remnant profiling experiments and AP-Western blot experiments,  
656 respectively. H.H. performed replicate iCLIP and replicate AP-Western blot  
657 experiments. C.R. and I.E. contributed evolutionary characterisation of Makorin  
658 proteins. A.D. and J.-Y.R. performed complementary studies in *D. melanogaster*. S.E.  
659 and K.Z. supervised the bioinformatics analyses. J.K. and P.B. conceived the project  
660 with K.Z. and supervised the experimental work. A.H., J.K., K.Z. and P.B. wrote the  
661 manuscript with help and comments from all co-authors.

## 662 **References**

- 663 Albrecht M, Lengauer T. 2004. Survey on the PABC recognition motif PAM2. *Biochem*  
664 *Biophys Res Commun* **316**: 129-138.
- 665 Arthur L, Pavlovic-Djuranovic S, Smith-Koutmou K, Green R, Szczesny P, Djuranovic  
666 S. 2015. Translational control by lysine-encoding A-rich sequences. *Sci Adv* **1**.
- 667 Bag J. 2001. Feedback inhibition of poly(A)-binding protein mRNA translation. A  
668 possible mechanism of translation arrest by stalled 40 S ribosomal subunits. *J Biol*  
669 *Chem* **276**: 47352-47360.
- 670 Bengtson MH, Joazeiro CA. 2010. Role of a ribosome-associated E3 ubiquitin ligase  
671 in protein quality control. *Nature* **467**: 470-473.
- 672 Böhne A, Darras A, D'Cotta H, Baroiller JF, Galiana-Arnoux D, Volff JN. 2010. The  
673 vertebrate makorin ubiquitin ligase gene family has been shaped by large-scale  
674 duplication and retroposition from an ancestral gonad-specific, maternal-effect  
675 gene. *BMC Genomics* **11**: 721.
- 676 Brandman O, Hegde RS. 2016. Ribosome-associated protein quality control. *Nat*  
677 *Struct Mol Biol* **23**: 7-15.
- 678 Brandman O, Stewart-Ornstein J, Wong D, Larson A, Williams CC, Li GW, Zhou S,  
679 King D, Shen PS, Weibezahn J et al. 2012. A ribosome-bound quality control  
680 complex triggers degradation of nascent peptides and signals translation stress.  
681 *Cell* **151**: 1042-1054.
- 682 Braun S, Enculescu M, Setty ST, Cortés-López M, de Almeida BP, Sutandy FXR,  
683 Schulz L, Busch A, Seiler M, Ebersberger S et al. 2018. Decoding a cancer-  
684 relevant splicing decision in the *RON* proto-oncogene using high-throughput  
685 mutagenesis. *Nat Commun* **9**: 3315.
- 686 Cassar PA, Carpenedo RL, Samavarchi-Tehrani P, Olsen JB, Park CJ, Chang WY,  
687 Chen Z, Choey C, Delaney S, Guo H et al. 2015. Integrative genomics positions  
688 MKRN1 as a novel ribonucleoprotein within the embryonic stem cell gene  
689 regulatory network. *EMBO Rep* **16**: 1334-1357.
- 690 Chatr-Aryamontri A, Oughtred R, Boucher L, Rust J, Chang C, Kolas NK, O'Donnell L,  
691 Oster S, Theesfeld C, Sellam A et al. 2017. The BioGRID interaction database:  
692 2017 update. *Nucleic Acids Res* **45**: D369-D379.

- 693 Choe YJ, Park SH, Hassemer T, Korner R, Vincenz-Donnelly L, Hayer-Hartl M, Hartl  
694 FU. 2016. Failure of RQC machinery causes protein aggregation and proteotoxic  
695 stress. *Nature* **531**: 191-195.
- 696 Chu J, Hong NA, Masuda CA, Jenkins BV, Nelms KA, Goodnow CC, Glynn RJ, Wu  
697 H, Masliah E, Joazeiro CA et al. 2009. A mouse forward genetics screen identifies  
698 LISTERIN as an E3 ubiquitin ligase involved in neurodegeneration. *Proc Natl Acad  
699 Sci U S A* **106**: 2097-2103.
- 700 Collaboration O. 2016. The ORFeome Collaboration: a genome-scale human ORF-  
701 clone resource. *Nat Methods* **13**: 191-192.
- 702 Cox J, Mann M. 2008. MaxQuant enables high peptide identification rates,  
703 individualized p.p.b.-range mass accuracies and proteome-wide protein  
704 quantification. *Nat Biotechnol* **26**: 1367-1372.
- 705 Cox J, Matic I, Hilger M, Nagaraj N, Selbach M, Olsen JV, Mann M. 2009. A practical  
706 guide to the MaxQuant computational platform for SILAC-based quantitative  
707 proteomics. *Nat Protoc* **4**: 698-705.
- 708 Cox J, Neuhauser N, Michalski A, Scheltema RA, Olsen JV, Mann M. 2011.  
709 Andromeda: a peptide search engine integrated into the MaxQuant environment.  
710 *J Proteome Res* **10**: 1794-1805.
- 711 Deo RC, Sonenberg N, Burley SK. 2001. X-ray structure of the human hyperplastic  
712 discs protein: an ortholog of the C-terminal domain of poly(A)-binding protein. *Proc  
713 Natl Acad Sci U S A* **98**: 4414-4419.
- 714 Dobin A, Davis CA, Schlesinger F, Drenkow J, Zaleski C, Jha S, Batut P, Chaisson M,  
715 Gingeras TR. 2013. STAR: ultrafast universal RNA-seq aligner. *Bioinformatics* **29**:  
716 15-21.
- 717 Dodt M, Roehr JT, Ahmed R, Dieterich C. 2012. FLEXBAR-Flexible Barcode and  
718 Adapter Processing for Next-Generation Sequencing Platforms. *Biology (Basel)* **1**:  
719 895-905.
- 720 Ebersberger I, Simm S, Leisegang MS, Schmitzberger P, Mirus O, von Haeseler A,  
721 Bohnsack MT, Schleiff E. 2014. The evolution of the ribosome biogenesis pathway  
722 from a yeast perspective. *Nucleic Acids Res* **42**: 1509-1523.

- 723 Elias JE, Gygi SP. 2007. Target-decoy search strategy for increased confidence in  
724 large-scale protein identifications by mass spectrometry. *Nat Methods* **4**: 207-214.
- 725 Franceschini A, Szklarczyk D, Frankild S, Kuhn M, Simonovic M, Roth A, Lin J,  
726 Minguéz P, Bork P, von Mering C et al. 2013. STRING v9.1: protein-protein  
727 interaction networks, with increased coverage and integration. *Nucleic Acids Res*  
728 **41**: D808-815.
- 729 Garzia A, Jafarnejad SM, Meyer C, Chapat C, Gogakos T, Morozov P, Amiri M, Shapiro  
730 M, Molina H, Tuschl T et al. 2017. The E3 ubiquitin ligase and RNA-binding protein  
731 ZNF598 orchestrates ribosome quality control of premature polyadenylated  
732 mRNAs. *Nat Commun* **8**: 16056.
- 733 Gray TA, Hernandez L, Carey AH, Schaldach MA, Smithwick MJ, Rus K, Marshall  
734 Graves JA, Stewart CL, Nicholls RD. 2000. The ancient source of a distinct gene  
735 family encoding proteins featuring RING and C(3)H zinc-finger motifs with  
736 abundant expression in developing brain and nervous system. *Genomics* **66**: 76-  
737 86.
- 738 Hafner M, Landthaler M, Burger L, Khorshid M, Hausser J, Berninger P, Rothballer A,  
739 Ascano M, Jr., Jungkamp AC, Munschauer M et al. 2010. Transcriptome-wide  
740 identification of RNA-binding protein and microRNA target sites by PAR-CLIP. *Cell*  
741 **141**: 129-141.
- 742 Harrow J, Frankish A, Gonzalez JM, Tapanari E, Diekhans M, Kokocinski F, Aken BL,  
743 Barrell D, Zadissa A, Searle S et al. 2012. GENCODE: the reference human  
744 genome annotation for The ENCODE Project. *Genome Res* **22**: 1760-1774.
- 745 Heidelberg JB, Voigt A, Borisova ME, Petrosino G, Ruf S, Wagner SA, Beli P. 2018.  
746 Proteomic profiling of VCP substrates links VCP to K6-linked ubiquitylation and c-  
747 Myc function. *EMBO Rep* **19**.
- 748 Hildebrandt A, Alanis-Lobato G, Voigt A, Zarnack K, Andrade-Navarro MA, Beli P,  
749 König J. 2017. Interaction profiling of RNA-binding ubiquitin ligases reveals a link  
750 between posttranscriptional regulation and the ubiquitin system. *Sci Rep* **7**: 16582.
- 751 Huppertz I, Attig J, D'Ambrogio A, Easton LE, Sibley CR, Sugimoto Y, Tajnik M, König  
752 J, Ule J. 2014. iCLIP: protein-RNA interactions at nucleotide resolution. *Methods*  
753 **65**: 274-287.



- 754 Jamar NH, Kritsiligkou P, Grant CM. 2018. Loss of mRNA surveillance pathways  
755 results in widespread protein aggregation. *Sci Rep* **8**: 3894.
- 756 Jiao X, Sherman BT, Huang da W, Stephens R, Baseler MW, Lane HC, Lempicki RA.  
757 2012. DAVID-WS: a stateful web service to facilitate gene/protein list analysis.  
758 *Bioinformatics* **28**: 1805-1806.
- 759 Joazeiro CAP. 2017. Ribosomal Stalling During Translation: Providing Substrates for  
760 Ribosome-Associated Protein Quality Control. *Annu Rev Cell Dev Biol* **33**: 343-  
761 368.
- 762 Juszkievicz S, Chandrasekaran V, Lin Z, Kraatz S, Ramakrishnan V, Hegde RS. 2018.  
763 ZNF598 Is a Quality Control Sensor of Collided Ribosomes. *Mol Cell* **72**: 469-481  
764 e467.
- 765 Juszkievicz S, Hegde RS. 2017. Initiation of Quality Control during Poly(A) Translation  
766 Requires Site-Specific Ribosome Ubiquitination. *Mol Cell* **65**: 743-750 e744.
- 767 Kaida D, Berg MG, Younis I, Kasim M, Singh LN, Wan L, Dreyfuss G. 2010. U1 snRNP  
768 protects pre-mRNAs from premature cleavage and polyadenylation. *Nature* **468**:  
769 664-668.
- 770 Katoh K, Standley DM. 2013. MAFFT multiple sequence alignment software version 7:  
771 improvements in performance and usability. *Mol Biol Evol* **30**: 772-780.
- 772 Kent WJ, Zweig AS, Barber G, Hinrichs AS, Karolchik D. 2010. BigWig and BigBed:  
773 enabling browsing of large distributed datasets. *Bioinformatics* **26**: 2204-2207.
- 774 Kim JH, Park KW, Lee EW, Jang WS, Seo J, Shin S, Hwang KA, Song J. 2014.  
775 Suppression of PPAR $\gamma$  through MKRN1-mediated ubiquitination and  
776 degradation prevents adipocyte differentiation. *Cell Death Differ* **21**: 594-603.
- 777 Kim JH, Park SM, Kang MR, Oh SY, Lee TH, Muller MT, Chung IK. 2005. Ubiquitin  
778 ligase MKRN1 modulates telomere length homeostasis through a proteolysis of  
779 hTERT. *Genes Dev* **19**: 776-781.
- 780 Kini HK, Silverman IM, Ji X, Gregory BD, Liebhaber SA. 2016. Cytoplasmic poly(A)  
781 binding protein-1 binds to genomically encoded sequences within mammalian  
782 mRNAs. *RNA* **22**: 61-74.

- 783 Ko A, Shin JY, Seo J, Lee KD, Lee EW, Lee MS, Lee HW, Choi IJ, Jeong JS, Chun  
784 KH et al. 2012. Acceleration of gastric tumorigenesis through MKRN1-mediated  
785 posttranslational regulation of p14ARF. *J Natl Cancer Inst* **104**: 1660-1672.
- 786 Koestler T, von Haeseler A, Ebersberger I. 2010. FACT: functional annotation transfer  
787 between proteins with similar feature architectures. *BMC Bioinformatics* **11**: 417.
- 788 König J, Zarnack K, Rot G, Curk T, Kayikci M, Zupan B, Turner DJ, Luscombe NM,  
789 Ule J. 2010. iCLIP reveals the function of hnRNP particles in splicing at individual  
790 nucleotide resolution. *Nat Struct Mol Biol* **17**: 909-915.
- 791 Kozlov G, De Crescenzo G, Lim NS, Siddiqui N, Fantus D, Kahvejian A, Trempe JF,  
792 Elias D, Ekiel I, Sonenberg N et al. 2004. Structural basis of ligand recognition by  
793 PABC, a highly specific peptide-binding domain found in poly(A)-binding protein  
794 and a HECT ubiquitin ligase. *EMBO J* **23**: 272-281.
- 795 Kozlov G, Menade M, Rosenauer A, Nguyen L, Gehring K. 2010. Molecular  
796 determinants of PAM2 recognition by the MLLE domain of poly(A)-binding protein.  
797 *J Mol Biol* **397**: 397-407.
- 798 Kozlov G, Trempe JF, Khaleghpour K, Kahvejian A, Ekiel I, Gehring K. 2001. Structure  
799 and function of the C-terminal PABC domain of human poly(A)-binding protein.  
800 *Proc Natl Acad Sci U S A* **98**: 4409-4413.
- 801 Kucukural A, Ozadam H, Singh G, Moore MJ, Cenik C. 2013. ASPeak: an abundance  
802 sensitive peak detection algorithm for RIP-Seq. *Bioinformatics* **29**: 2485-2486.
- 803 Lee EW, Lee MS, Camus S, Ghim J, Yang MR, Oh W, Ha NC, Lane DP, Song J. 2009.  
804 Differential regulation of p53 and p21 by MKRN1 E3 ligase controls cell cycle arrest  
805 and apoptosis. *EMBO J* **28**: 2100-2113.
- 806 Letzring DP, Wolf AS, Brule CE, Grayhack EJ. 2013. Translation of CGA codon  
807 repeats in yeast involves quality control components and ribosomal protein L1.  
808 *RNA* **19**: 1208-1217.
- 809 Li H, Handsaker B, Wysoker A, Fennell T, Ruan J, Homer N, Marth G, Abecasis G,  
810 Durbin R, Genome Project Data Processing S. 2009. The Sequence  
811 Alignment/Map format and SAMtools. *Bioinformatics* **25**: 2078-2079.

- 812 Lima SA, Chipman LB, Nicholson AL, Chen YH, Yee BA, Yeo GW, Collier J, Pasquinelli  
813 AE. 2017. Short poly(A) tails are a conserved feature of highly expressed genes.  
814 *Nat Struct Mol Biol* **24**: 1057-1063.
- 815 Lu J, Deutsch C. 2008. Electrostatics in the ribosomal tunnel modulate chain  
816 elongation rates. *J Mol Biol* **384**: 73-86.
- 817 Lyabin DN, Eliseeva IA, Skabkina OV, Ovchinnikov LP. 2011. Interplay between Y-  
818 box-binding protein 1 (YB-1) and poly(A) binding protein (PABP) in specific  
819 regulation of YB-1 mRNA translation. *RNA Biol* **8**: 883-892.
- 820 Michalski A, Damoc E, Hauschild JP, Lange O, Wieghaus A, Makarov A, Nagaraj N,  
821 Cox J, Mann M, Horning S. 2011. Mass spectrometry-based proteomics using Q  
822 Exactive, a high-performance benchtop quadrupole Orbitrap mass spectrometer.  
823 *Mol Cell Proteomics* **10**: M111 011015.
- 824 Miroci H, Schob C, Kindler S, Olschlager-Schutt J, Fehr S, Jungenitz T, Schwarzacher  
825 SW, Bagni C, Mohr E. 2012. Makorin ring zinc finger protein 1 (MKRN1), a novel  
826 poly(A)-binding protein-interacting protein, stimulates translation in nerve cells. *J*  
827 *Biol Chem* **287**: 1322-1334.
- 828 Nielsen ML, Vermeulen M, Bonaldi T, Cox J, Moroder L, Mann M. 2008.  
829 Iodoacetamide-induced artifact mimics ubiquitination in mass spectrometry. *Nat*  
830 *Methods* **5**: 459-460.
- 831 Olsen JV, Macek B, Lange O, Makarov A, Horning S, Mann M. 2007. Higher-energy  
832 C-trap dissociation for peptide modification analysis. *Nat Methods* **4**: 709-712.
- 833 Omwanicha J, Zhou XF, Chen SY, Baslan T, Fisher CJ, Zheng Z, Cai C, Shemshedini  
834 L. 2006. Makorin RING finger protein 1 (MKRN1) has negative and positive effects  
835 on RNA polymerase II-dependent transcription. *Endocrine* **29**: 363-373.
- 836 Pohlmann T, Baumann S, Haag C, Albrecht M, Feldbrügge M. 2015. A FYVE zinc  
837 finger domain protein specifically links mRNA transport to endosome trafficking.  
838 *Elife* **4**.
- 839 Quinlan AR, Hall IM. 2010. BEDTools: a flexible suite of utilities for comparing genomic  
840 features. *Bioinformatics* **26**: 841-842.

- 841 Rappsilber J, Mann M, Ishihama Y. 2007. Protocol for micro-purification, enrichment,  
842 pre-fractionation and storage of peptides for proteomics using StageTips. *Nat*  
843 *Protoc* **2**: 1896-1906.
- 844 Ritchie ME, Phipson B, Wu D, Hu Y, Law CW, Shi W, Smyth GK. 2015. limma powers  
845 differential expression analyses for RNA-sequencing and microarray studies.  
846 *Nucleic Acids Res* **43**: e47.
- 847 Saito R, Smoot ME, Ono K, Ruscheinski J, Wang PL, Lotia S, Pico AR, Bader GD,  
848 Ideker T. 2012. A travel guide to Cytoscape plugins. *Nat Methods* **9**: 1069-1076.
- 849 Salvatico J, Kim JH, Chung IK, Muller MT. 2010. Differentiation linked regulation of  
850 telomerase activity by Makorin-1. *Mol Cell Biochem* **342**: 241-250.
- 851 Schindelin J, Rueden CT, Hiner MC, Eliceiri KW. 2015. The ImageJ ecosystem: An  
852 open platform for biomedical image analysis. *Mol Reprod Dev* **82**: 518-529.
- 853 Simms CL, Yan LL, Zaher HS. 2017. Ribosome Collision Is Critical for Quality Control  
854 during No-Go Decay. *Mol Cell* **68**: 361-373 e365.
- 855 Simsek D, Tiu GC, Flynn RA, Byeon GW, Leppek K, Xu AF, Chang HY, Barna M. 2017.  
856 The Mammalian Ribo-interactome Reveals Ribosome Functional Diversity and  
857 Heterogeneity. *Cell* **169**: 1051-1065 e1018.
- 858 Sonnhammer EL, Gabaldon T, Sousa da Silva AW, Martin M, Robinson-Rechavi M,  
859 Boeckmann B, Thomas PD, Dessimoz C, Quest for Orthologs c. 2014. Big data  
860 and other challenges in the quest for orthologs. *Bioinformatics* **30**: 2993-2998.
- 861 Stamatakis A. 2014. RAxML version 8: a tool for phylogenetic analysis and post-  
862 analysis of large phylogenies. *Bioinformatics* **30**: 1312-1313.
- 863 Sundaramoorthy E, Leonard M, Mak R, Liao J, Fulzele A, Bennett EJ. 2017. ZNF598  
864 and RACK1 Regulate Mammalian Ribosome-Associated Quality Control Function  
865 by Mediating Regulatory 40S Ribosomal Ubiquitylation. *Mol Cell* **65**: 751-760 e754.
- 866 Supek F, Bosnjak M, Skunca N, Smuc T. 2011. REVIGO summarizes and visualizes  
867 long lists of gene ontology terms. *PLoS One* **6**: e21800.
- 868 Sutandy FXR, Ebersberger S, Huang L, Busch A, Bach M, Kang HS, Fallmann J,  
869 Maticzka D, Backofen R, Stadler PF et al. 2018. In vitro iCLIP-based modeling  
870 uncovers how the splicing factor U2AF2 relies on regulation by cofactors. *Genome*  
871 *Res* **28**: 699-713.

- 872 Sutandy FXR, Hildebrandt A, König J. 2016. Profiling the Binding Sites of RNA-Binding  
873 Proteins with Nucleotide Resolution Using iCLIP. *Methods Mol Biol* **1358**: 175-195.
- 874 Verma R, Oania RS, Kolawa NJ, Deshaies RJ. 2013. Cdc48/p97 promotes  
875 degradation of aberrant nascent polypeptides bound to the ribosome. *Elife* **2**:  
876 e00308.
- 877 Wagner SA, Beli P, Weinert BT, Nielsen ML, Cox J, Mann M, Choudhary C. 2011. A  
878 proteome-wide, quantitative survey of in vivo ubiquitylation sites reveals  
879 widespread regulatory roles. *Mol Cell Proteomics* **10**: M111 013284.
- 880 Webster MW, Chen YH, Stowell JAW, Alhusaini N, Sweet T, Graveley BR, Coller J,  
881 Passmore LA. 2018. mRNA Deadenylation Is Coupled to Translation Rates by the  
882 Differential Activities of Ccr4-Not Nucleases. *Mol Cell* **70**: 1089-1100 e1088.
- 883 Weinert BT, Scholz C, Wagner SA, Iesmantavicius V, Su D, Daniel JA, Choudhary C.  
884 2013. Lysine succinylation is a frequently occurring modification in prokaryotes and  
885 eukaryotes and extensively overlaps with acetylation. *Cell Rep* **4**: 842-851.

## Supplemental Tables and Legends

### Supplemental Tables S1,3,4

Provided as Excel files

**Supplemental Tables S2: Summary of MKRN1 iCLIP experiments.** iCLIP experiments with GFP-MKRN1 were performed in three independent replicates.

|              | Sequenced reads   | Uniquely mapped reads | Crosslink events | Binding sites |
|--------------|-------------------|-----------------------|------------------|---------------|
| Replicate 1  | 3,418,021         | 1,561,445             | 957,097          | -             |
| Replicate 2  | 6,527,256         | 3,149,583             | 1,972,821        | -             |
| Replicate 3  | 4,660,274         | 2,515,161             | 2,293,633        | -             |
| <b>Total</b> | <b>14,605,551</b> | <b>7,226,189</b>      | <b>5,223,551</b> | <b>7,331</b>  |

### Supplemental Table S5: Primers used in this study.

| Name        | Sequence 5' – 3'               | Comment                  |
|-------------|--------------------------------|--------------------------|
| PAMmut      | GCCGTTGCCGGGCAACCCTACTGTGGC    | MKRN1 <sup>PAM2mut</sup> |
|             | CTCAATAGAATTCACCCAGTCCTCTGAACC | mutant                   |
| H307E       | CAACTGCAACGAAACCTACTGTCTCAAG   | MKRN1 <sup>RINGmut</sup> |
|             | GAGAGGATCCCGAAGCGG             | mutant                   |
| MKRN1 qPCR  | CGATACGGGGAGAACTGTGT           | <i>MKRN1</i> qPCR        |
|             | CCTTCTCATGGGCCTCAAT            | primer                   |
| ZNF598 qPCR | AACCTCGACAAATGGTCCTG           | <i>ZNF598</i> qPCR       |
|             | GTCTTCGTCCTTGAGCTTCG           | primer                   |
| βActin qPCR | TCCTCCCTGGAGAAGAGCTAC          | <i>β-actin</i> qPCR      |
|             | TGGAGTTGAAGGTAGTTCGTG          | primer                   |

**Supplemental Table S6: siRNAs used in this study.**

| Name          | Sequence 5' – 3'              | Comment                       |
|---------------|-------------------------------|-------------------------------|
| MKRN1 siRNA1  | CAGGCGAAGCUGAGUCAAGAA[dT][dT] | Ko et al. 2012                |
| MKRN1 siRNA2  | CGGGAUCCUCUCCAACUGCAA[dT][dT] | Kim et al. 2014               |
| ZNF598 siRNA  | CCCUCUAAAGUUGGGAAGA[dT][dT]   | Sigma, Rosetta<br>predictions |
| Control siRNA | UGGUUUACAUGUCGACUAA[dT][dT]   | Heidelberger et al.<br>2018   |

886 **Figure legends**

887 **Figure 1.** MKRN1 interacts with PABP and other regulators of translation and RNA  
888 stability. (A) Protein interactome of GFP-MKRN1<sup>wt</sup> in HEK293T cells analysed by  
889 quantitative MS-based proteomics. Combined SILAC ratios (n = 3 replicates) after z-  
890 score normalisation are plotted against log<sub>10</sub>-transformed intensities. 1,100 protein  
891 groups were quantified in at least two out of three replicate experiments. MKRN1 and  
892 significant interactors are highlighted (FDR < 5%). (B) A PAM2 motif similar to the  
893 previously reported consensus (shown on top; **Supplemental Fig. S1B**) (Albrecht and  
894 Lengauer 2004) is present in MKRN1 (first amino acid position indicated on the left).  
895 Introduced mutations in MKRN1<sup>PAM2mut</sup> are indicated in red below. Relevant positions  
896 are highlighted (**Supplemental Fig. S1B**). (C) Endogenous PABP interacts with  
897 MKRN1<sup>wt</sup> and MKRN1<sup>RINGmut</sup>, but not with MKRN1<sup>PAM2mut</sup>. Western blots for  
898 endogenous PABPC1 and GFP (two exposure times, exp.) after AP of GFP-MKRN1  
899 (wt and mutants). Ratios of PABP signal (normalised to input) in GFP-MKRN APs over  
900 control (GFP empty vector, EV) are shown on the right. Replicates 2, 3, and uncropped  
901 gel images are shown in **Supplemental Fig. S9A-C**. (D) Quantitative comparison of  
902 the interactomes of GFP-MKRN1<sup>wt</sup> and GFP-MKRN1<sup>PAM2mut</sup> shows that PABP and  
903 several other interactors are lost upon PAM2 mutation. Combined ratios of three  
904 replicates are shown in a scatter plot. Only proteins detected in at least two out of three  
905 replicates are shown. MKRN1<sup>wt</sup> significant interactors (from A) are highlighted as in (A)  
906 (FDR < 5% in MKRN1<sup>wt</sup>).



907 **Figure 2.** MKRN1 binds upstream of A-stretches in 3' UTRs. (A) MKRN1  
908 predominantly binds in the 3' UTR of protein-coding genes. Piecharts summarising the  
909 distribution of MKRN1 binding sites to different RNA biotypes (7,331 binding sites, left)  
910 and different regions within protein-coding transcripts (6,913 binding sites, right). (B)  
911 MKRN1 binding sites display a downstream enrichment of AAAA homopolymers.  
912 Frequency per nucleotide (nt) for four homopolymeric 4-mers in a 101-nt window  
913 around the midpoints of the top 20% MKRN1 binding sites (according to signal-over-  
914 background; see Material and methods). (C) MKRN1 crosslink events accumulate  
915 upstream of A-stretches. Metaprofile (top) shows the mean crosslink events per nt in  
916 a 201-nt window around the start position of 1,412 MKRN1-associated A-stretches in  
917 3' UTRs. Heatmap visualisation (bottom) displays crosslink events per nt (see colour  
918 scale) in a 101-nt window around the MKRN1-associated A-stretches. (D) MKRN1  
919 binding site strength (signal-over-background, SOB) increases with length of longest  
920 continuous run of A's (LCA) within the A-stretch. Mean and standard deviation of  
921 MKRN1 binding sites associated with A-stretches harbouring LCAs of increasing  
922 length (x-axis). MKRN1 binding sites without associated A-stretches are shown for  
923 comparison on the left. Number of binding sites in each category indicated as bar chart  
924 above. (E) MKRN1 binds upstream of A-stretches in the 3' UTR of the *LARP1* gene.  
925 Genome browser view of GFP-MKRN1 iCLIP data showing crosslink events per nt  
926 (merged replicates, turquoise) together with binding sites (lilac) and associated A-  
927 stretches (dark green).

928 **Figure 3.** MKRN1 binds at poly(A) tails. (A) MKRN1 binds near the polyadenylation  
929 site of the *SRSF4* gene. Genome browser view as in **Fig. 2E**. (B) Unmapped MKRN1  
930 iCLIP reads display increased A-content (more than half of all nucleotides in the read),  
931 evidencing poly(A) tail binding. Cumulative fraction of iCLIP reads (y-axis, merged  
932 replicates) that could not be mapped to the human genome (see Materials and  
933 methods) and show at least a given A-content (x-axis). iCLIP data for the unrelated  
934 RBP HNRNPH (Braun et al. 2018) are shown for comparison. (C) MKRN1 crosslink  
935 events increase towards 3'UTR ends. Metaprofile shows the sum of crosslink events  
936 per nt in a 2001-nt window around annotated polyadenylation sites of transcripts with  
937 >1 kb 3' UTRs (n = 11,257). (D) Overall RNA binding of MKRN1 is strongly reduced  
938 when abrogating PABP interaction. Autoradiograph (left) of UV crosslinking  
939 experiments (replicate 1, with 4SU and UV crosslinking at 365 nm; replicates 2 and 3  
940 in **Supplemental Fig. S5**) comparing GFP-MKRN1<sup>PAM2mut</sup> with GFP-MKRN1<sup>wt</sup> at  
941 different dilution steps for calibration. Quantification of radioactive signal of protein-  
942 RNA complexes and corresponding Western blots shown on the right. Uncropped gel  
943 images are shown in **Supplemental Fig. S10**.

944 **Figure 4.** MKRN1 stalls ribosomes at poly(A) sequences. (A) The dual fluorescence  
945 reporter harbours an N-terminal GFP, followed by a FLAG-SR-X linker and a C-  
946 terminal RFP, which are separated by P2A sites to ensure translation into three  
947 separate proteins (Juszkiewicz and Hegde 2017). The resulting GFP:RFP ratio was  
948 determined using flow cytometry. The inserted fragment K(AAA)<sub>20</sub> encodes 20 lysines  
949 by repeating the codon AAA. The starting vector without insert (K<sub>0</sub>) served as control.  
950 Schematic ribosomes illustrate translation of the respective reporter segments. (B)  
951 Ribosomes are efficiently stalled at K(AAA)<sub>20</sub> in HEK293T cells. Median RFP:GFP  
952 ratios, normalised to K<sub>0</sub>, are shown. Error bars represent standard deviation of the  
953 mean (s.d.m., n = 6 replicates). *P* value indicated above (paired two-tailed t-test). (C)  
954 Ribosomes fail to stall in the absence of MKRN1. HEK293T cells were transfected with  
955 control siRNA or siRNAs targeting *MKRN1* (KD1 and KD2) or *ZNF598* for 24 h,  
956 followed by transfection of the reporter plasmids for 48 h. Western blots for KDs are  
957 shown in **Supplemental Fig. S6B**. RFP and GFP signals were analysed by flow  
958 cytometry. Median RFP:GFP ratios, normalised to K<sub>0</sub> in control, are shown. Error bars  
959 represent s.d.m.; *P* values indicated above (paired two-tailed t-test, Benjamini-  
960 Hochberg correction, n ≥ 6 replicates; ns, not significant).

961 **Figure 5.** MKRN1 ubiquitylates ribosomal protein RPS10 and translational regulators.  
962 (A) Ubiquitin remnant profiling to compare the relative abundance of ubiquitylation sites  
963 in *MKRN1* KD2 and control HEK293T cells. Ubiquitin remnant peptides were enriched  
964 and analysed by quantitative mass spectrometry, quantifying a total of 15,528  
965 ubiquitylation sites on 4,790 proteins. 29 putative MKRN1 target sites with significantly  
966 decreased ubiquitylation upon *MKRN1* KD2 (FDR < 10%, n = 4 replicates) are  
967 highlighted and labelled with the respective protein name. Note that many proteins  
968 contain several differentially regulated ubiquitylation sites. (B) Protein interaction  
969 network of 21 proteins with putative MKRN1 ubiquitylation target sites (significantly  
970 reduced, shown in (A)). The functional interactions were obtained from the STRING  
971 and BioGrid databases and our study. Visualisation by Cytoscape. (C) Ubiquitin  
972 remnant profiling results for significantly regulated ubiquitylation sites (FDR < 10%) in  
973 proteins from network in (B). Mean and standard deviation of the mean (s.d.m., error  
974 bars) are given together with all data points. (D) Ubiquitin remnant profiling results for  
975 seven quantified ubiquitylation sites in RPS10 and RPS20. Significant changes are  
976 shown in black (FDR < 10%) and non-significant changes in grey. Representation as  
977 in (C). (E) Comparison of ubiquitylation sites in selected target proteins that are  
978 modified by ZNF598 and MKRN1 during RQC. (F) Comparison of enriched proteins  
979 from the interactomes for GFP-MKRN1<sup>wt</sup> (over GFP, see **Fig. 1A**) and GFP-  
980 MKRN1<sup>RINGmut</sup> (over GFP-MKRN1<sup>wt</sup>, see **Supplemental Fig. S7B**) with the proteins  
981 containing MKRN1 ubiquitylation targets sites (UB, see (A)). Protein names of  
982 overlapping targets are given.

983

984 **Figure 6.** MKRN1 is a sensor for poly(A) sequences that stalls ribosomes to initiate  
985 ribosome-associated quality control. Proposed model of MKRN1 function: MKRN1 is  
986 positioned upstream of (premature) poly(A) tails via interaction with PABP. Ribosomes  
987 translating the open reading frame run into MKRN1 that acts as a roadblock to prohibit  
988 poly(A) translation. Upon contact with the translating ribosome, MKRN1 ubiquitylates  
989 the 40S ribosomal protein RPS10. This stalls the ribosome, causing the trailing  
990 ribosomes to collide. ZNF598 recognises the collided ribosomes and ubiquitylates  
991 ribosomal proteins to promote RQC.

992  
993

#### 994 **Supplemental figure legends**

995 **Supplemental Figure S1.** Maximum likelihood tree of Makorin orthologs with their  
996 protein domain architecture. (A) Maximum likelihood tree with 100 bootstrap replicates  
997 of selected vertebrate and invertebrate orthologs and *C. elegans* as an outgroup.  
998 Bootstrap values at each node indicate the number of replicates (out of 100) that  
999 support the local tree structure and thereby serve as confidence estimates. Protein  
1000 schematics (drawn to scale) on the right depict protein domains corresponding to the  
1001 following PFAM domains: RING-type zinc finger, PF13445; MKRN1 C-terminus,  
1002 PF15815; CCCH zinc finger, PF15663, PF14608 and PF00642. PAM2 motifs,  
1003 predicted to interact with the MLLE domain of PABP proteins (Kozlov et al. 2001) as  
1004 well as the recently reported derivative PAM2L (Pohlmann et al. 2015), were added  
1005 separately (see Material and methods). Abbreviated and full species names with  
1006 corresponding UniProt identifiers in order of appearance: ANOGA, *Anopheles*  
1007 *gambiae*, Q7QF83; BOVIN, *Bos taurus*, F1MF12, F6QQR5; BRAFL, *Branchiostoma*  
1008 *floridae*, C3Y7M0; CAEEL, *Caenorhabditis elegans*, Q9N373; CANLF, *Canis lupus*,  
1009 J9P921, E2RRA5, E2REH2, J9P9K3; DANRE, *Danio rerio*, Q4VBT5, Q9DFG8,

1010 A9C4A6; DROME, *Drosophila melanogaster*, Q9VP20; CHICKEN, *Gallus gallus*,  
1011 Q9PTI4, F1NI93; GORGO, *Gorilla gorilla*, G3S6Y3, G3QDU4, G3RZ99; HUMAN,  
1012 *Homo sapiens*, Q9UHC7, Q9H000, Q13064; IXOSC, *Ixodes scapularis*, B7QIJ9,  
1013 B7Q4B2; LEPOC, *Lepisosteus oculatus*, W5NGW8, W5N9B2, W5LWJ1; MONDO,  
1014 *Monodelphis domestica*, F6QPR3, F7F0I3; MOUSE, *Mus musculus*, Q9QXP6,  
1015 Q9ERV1, Q60764; ORYLA, *Oryzias latipes*, H2MBR3, H2M1P4, H2LQG1; PANTR,  
1016 *Pan troglodytes*, H2QVH8, H2QM29, H2Q915; RAT, *Rattus norvegicus*,  
1017 A0A0G2QC40, Q5XI23, D3ZY41; XENTR, *Xenopus tropicalis*, Q6GLD9, B4F720. (B)  
1018 The PAM2 motif in Makorin proteins from vertebrates (bottom, species abbreviations  
1019 as in (A)) shows similarities to PAM2 in known PABP-interacting proteins from human  
1020 (top, protein names given; first amino acid position for all PAM2 motifs indicated on the  
1021 left in grey). The PAM2 consensus (Kozlov et al. 2001) is given above. Positions 9, 10  
1022 and 12 within the aligned regions that are highly consistent between all aligned proteins  
1023 and important for PAM2 function (Kozlov et al. 2004) are highlighted in brown.  
1024 Mutations that were introduced to abrogate the function of the PAM2 motif in human  
1025 MKRN1 (MKRN1<sup>PAM2mut</sup>) are shown below. The corresponding UniProt identifiers are  
1026 Q8IYD1, Q8NDV7, Q99700, Q9H074, Q9BPZ3 (known PABP-interacting proteins  
1027 from human), Q9UHC7, H2QVH8, G3S6Y3, J9P921, E2RRA5, F1MF12, Q5XI23,  
1028 Q9QXP6, Q9PTI4, F6QPR3, W5NGW8, Q4VBT5, H2MBR3 (Makorin orthologs from  
1029 vertebrates). (C) The closest Makorin orthologs in *Saccharomyces cerevisiae* lack  
1030 RING domain and PAM2 motif. Domain architecture of Yth1p and Lee1p, which were  
1031 detected as closest orthologs by HaMStR-OneSeq (Ebersberger et al. 2014), but were  
1032 not considered as orthologs due to low FAS scores (0,59 and 0,60, respectively). The  
1033 annotated PFAM domains are CCCH zinc finger, PF15663, PF00642, PF16131.

1034

1035 **Supplemental Figure S2.** MKRN1 interacts with translational regulators and other  
1036 RBPs. (A) Overlap of the 53 significant interaction partners of GFP-MKRN1<sup>wt</sup> in human  
1037 HEK293T cells with previously published interactors of MKRN1 in mouse embryonic  
1038 stem cells (mESC) (Cassar et al. 2015). (B) GO terms enriched for the 53 MKRN1  
1039 interactors. *P* values (modified Fisher exact test, Benjamini-Hochberg correction) are  
1040 depicted for all significant GO terms (corrected *P* value < 0.05) for Biological Process,  
1041 Molecular Function and Cellular Compartment, together with the number of interactors  
1042 associated with the respective term. (C) Reciprocal APs show that MKRN1 interacts  
1043 with PABPC1, ELAVL1 and IGF2BP1 independently of RNA. AP with GFP-PABPC1,  
1044 GFP-ELAVL1 and GFP-IGF2BP1 as baits were performed from HEK293T cells in the  
1045 presence or absence of RNase A and T1. Bait proteins and endogenous MKRN1 were  
1046 detected by Western blots (replicate 1). Different exposure times (exp.) for MKRN1 are  
1047 shown for GFP-ELAVL1 and GFP-IGF2BP1 APs. Quantifications (fold changes of the  
1048 MKRN1 signal over empty vector (EV)) of three replicates are shown on the right.  
1049 Replicates 2 and 3, and uncropped gel images are shown in **Supplemental Fig. S9D-**  
1050 **F.**

1051

1052 **Supplemental Figure S3.** Signal-over-background transformation allows to estimate  
1053 MKRN1 binding strength. (A-C) Raw iCLIP signal before signal-over-background  
1054 transformation. (A) Scatter plots show pairwise comparisons of crosslink events per  
1055 binding site in three replicate MKRN1 iCLIP experiments. Pearson correlation  
1056 coefficients (*r*) and associated *P* values are given. (B) Density plots depict the  
1057 distribution of crosslink events per binding site in the three replicate experiments.  
1058 Shades of blue indicate 20% quantiles; top 20% of binding sites with highest counts  
1059 are denoted by a dashed line. (C) Raw iCLIP counts are strongly influenced by the

1060 expression level of the underlying gene. MKRN1-bound genes were stratified into 50  
1061 bins with increasing expression (using the total number of MKRN1 crosslink events  
1062 within the 3' UTR as a proxy of a gene's expression level). Shown is the average  
1063 number of crosslink events per binding site for all binding sites in each bin. Dashed  
1064 line denotes median across all bins. (D-F) Signal-over-background (SOB) values allow  
1065 to correct for expression-level differences. (D) Pairwise comparison of SOB values for  
1066 the three MKRN1 iCLIP replicate experiments. Scatter plots as in (A). (E) Distribution  
1067 of SOB values in the three replicates. Density plots as in (B). Shades of blue indicate  
1068 20% quantiles. Dashed lines denote the top 20% MKRN1 binding sites with strongest  
1069 binding that were used for the analyses in **Fig. 2B** and **Supplemental Fig. S4A**. (F)  
1070 SOB values are independent of the expression level of the underlying gene. Average  
1071 SOB values for all binding sites in each expression bin are shown as in (C).

1072

1073 **Supplemental Figure S4.** MKRN1 binds upstream of long A-stretches. (A) Binding  
1074 sites with associated A-stretches show stronger MKRN1 binding. Boxplot compares  
1075 the SOB values of MKRN1 binding sites in 3' UTRs with and without associated A-  
1076 stretches. Number of binding sites indicated inside box. (B) Heatmap representation  
1077 of 1,412 non-overlapping A-stretches at MKRN1 binding sites, sorted by increasing  
1078 length (8-30 nt). Only A's are coloured. (C) MKRN1 binding site strength (signal-over-  
1079 background, SOB) increases with length of associated A-stretch. Mean and standard  
1080 deviation of MKRN1 binding sites associated with A-stretches of increasing length (x-  
1081 axis). MKRN1 binding sites without associated A-stretches are shown for comparison  
1082 on the left. Number of binding sites in each category indicated as barchart above. (D)  
1083 The top 20% MKRN1 binding sites show a strong RNA binding preference for AAAA.  
1084 Scatter plot compares the frequency of 4-mers within the 9-nt MKRN1 binding sites



1085 and flanking 40-nt windows for the top 20% and bottom 20% MKRN1 binding sites  
1086 (according to SOB). 4-mer frequencies are displayed as z-scores based on  
1087 background distribution from binding site permutations.

1088

1089 **Supplemental Figure S5.** Interaction with PABP is required for MKRN1 RNA binding.  
1090 (A,B) UV crosslinking experiments to measure the RNA binding capacity of GFP-  
1091 MKRN1<sup>wt</sup> and GFP-MKRN1<sup>PAM2mut</sup>. Autoradiographs (top) and Western blots (bottom)  
1092 show GFP-MKRN1/RNA complexes and GFP-MKRN1 protein, respectively, in the  
1093 eluates from replicates 2 (with 4SU and UV crosslinking at 365 nm) (A) and 3 (with  
1094 conventional UV crosslinking at 254 nm) (B). For calibration, input samples for GFP-  
1095 MKRN1<sup>wt</sup> were diluted to 75%, 50% and 25% prior to GFP AP. Note that samples were  
1096 loaded in different order in (B). Quantifications are given below. Uncropped gel images  
1097 are shown in **Supplemental Fig. S10**.

1098

1099 **Supplemental Figure S6.** MKRN1 is required to stall ribosomes at K(AAA)<sub>20</sub> in  
1100 reporter assays. (A) Translation of dual fluorescence reporter plasmids was assessed  
1101 by flow cytometry upon *MKRN1* and/or *ZNF598* KD. Median RFP:GFP ratios  
1102 (normalised to K<sub>0</sub> in control KD) are shown for the reporter plasmids K<sub>0</sub>, K(AAA)<sub>12</sub>,  
1103 K(AAA)<sub>20</sub>, and R(CG A)<sub>10</sub>. Error bars represent standard deviation of the mean (s.d.m.,  
1104 n ≥ 6 replicates; paired two-tailed t-test, Benjamini-Hochberg correction). Density plot  
1105 of median RFP:GFP ratios of one replicate experiment with K(AAA)<sub>20</sub> with control or  
1106 *MKRN1* KD (two independent siRNAs, KD1 and KD2) or *ZNF598* is shown on the right.  
1107 (B) KDs of *MKRN1* and *ZNF598* were assessed by Western blot (n = 3 replicates).  
1108 Black arrowhead indicates ZNF598. Replicates 2 and 3, and uncropped gel images  
1109 are shown in **Supplemental Fig. S11A,B**. (C) *MKRN1* KD2 also reduces *MKRN2*

1110 levels. *MKRN1* KD1 and KD2 were performed for 72 h. Expression levels of *MKRN1*  
1111 and *MKRN2* were assessed in relation to  $\beta$ -actin levels by qPCR in *MKRN1* KD (siRNA  
1112 1 and 2) and control KD. Error bars indicate s.d.m. (n = 2 replicates). (D,E) Cross-  
1113 regulation of *MKRN1* and *ZNF598*. (D) *MKRN1* KD1 reduces endogenous *ZNF598*  
1114 protein levels. Effect of *MKRN1* KD (KD1, siRNA 1 and KD2, siRNA 2) and *ZNF598*  
1115 KD for 72 h was assessed by Western blot for endogenous *MKRN1* and *ZNF598*.  
1116 Quantifications depict *MKRN1* or *ZNF598* expression levels in *MKRN1* or *ZNF598* KD  
1117 over control KD condition, normalised to tubulin levels (n = 3 replicates). Replicates 2  
1118 and 3, and uncropped gel images are shown in **Supplemental Fig. S11C,D**. (E)  
1119 *ZNF598* overexpression reduces *MKRN1* protein levels. Effect of *ZNF598* and *MKRN1*  
1120 (wt and mutants) overexpression was tested after 48 h. Quantification as in (D).  
1121 Uncropped gel images for all replicates are shown in **Supplemental Fig. S11E,F**.

1122

1123 **Supplemental Figure S7.** Interactome of GFP-*MKRN1*<sup>RINGmut</sup> reveals putative  
1124 ubiquitylation substrates. Experiments were performed using SILAC-based MS.  
1125 Asymmetrical z-scores of combined SILAC ratios (n = 3 replicates) are shown. Proteins  
1126 are detected in at least two out of three replicates. (A) Protein interactome of GFP-  
1127 *MKRN1*<sup>RINGmut</sup> in HEK293T cells analysed by quantitative mass spectrometry.  
1128 Combined SILAC ratios (n = 3 replicates) after z-score normalisation are plotted  
1129 against log<sub>10</sub>-transformed intensities. 1,097 protein groups were quantified in at least  
1130 two out of three replicates (**Supplemental Table S1**). *MKRN1* and interesting  
1131 candidate ubiquitylation targets are highlighted. (B) Quantitative comparison of the  
1132 interactome of GFP-*MKRN1*<sup>wt</sup> and GFP-*MKRN1*<sup>RINGmut</sup> shows that potential  
1133 ubiquitylation candidates identified in (A) are enriched in GFP-*MKRN1*<sup>RINGmut</sup> over  
1134 GFP-*MKRN1*<sup>wt</sup>. Comparison reveals 137 proteins to be significantly enriched

1135 (MKRN1<sup>RINGmut</sup> over MKRN1<sup>wt</sup> with FDR < 5% and MKRN1<sup>wt</sup>/GFP z-score > 1).  
1136 Combined ratios of three replicates are shown in a scatter plot. Only proteins detected  
1137 in at least two out of three replicates are shown. Highlighting as in (A).

1138

1139 **Supplemental Figure S8.** GO term analysis of MKRN1 ubiquitylation targets and  
1140 proteome analysis upon *MKRN1* KD. (A) GO terms enriched for the 21 MKRN1  
1141 ubiquitylation targets. Corrected *P* values (modified Fisher exact test, Benjamini-  
1142 Hochberg correction) are depicted for all significant GO terms (corrected *P* value <  
1143 0.05) for Biological Process (BP), Molecular Function (MF) and Cellular Compartment  
1144 (CC), together with the number of ubiquitylation targets associated with the respective  
1145 term. (B) Proteome analysis of *MKRN1* KD in HEK293T cells analysed by quantitative  
1146 mass spectrometry. Log<sub>2</sub>-transformed, combined normalised SILAC ratios (*n* = 3  
1147 replicates) are plotted against log<sub>10</sub>-transformed intensities. 6,425 protein groups were  
1148 quantified in at least one out of three replicate experiments (**Supplemental Table S4**).  
1149 Selected ubiquitylation targets of MKRN1 are highlighted.

1150

1151 **Supplemental Figure S9.** Images of full membranes and different exposure times  
1152 (exp.) for Western blot analyses in **Fig. 1C** and **Supplemental Fig. S2C** in the  
1153 presence or absence of RNase A and T1. (A-C) PABP interacts with MKRN1<sup>wt</sup> and  
1154 MKRN1<sup>RINGmut</sup> but not MKRN1<sup>PAM2mut</sup>. Western blot analysis was performed with  
1155 antibodies against PABPC1/3 and GFP. Images of full membranes and different  
1156 exposure (exp.) times for both antibodies are shown for replicate 1 (A) which is  
1157 presented in **Fig. 1C**, as well as replicates 2 (B) and 3 (C). Black and blue arrowheads  
1158 indicate GFP-MKRN1 and PABPC1/3, respectively. (D-F) Endogenous MKRN1  
1159 interacts with GFP-PABPC1 independent of RNA. Western blot analysis was

1160 performed with antibodies against MKRN1 and GFP. Images of full membranes and  
1161 different exposure times for both antibodies are shown for replicate 1 (*D*) which is  
1162 presented in **Supplemental Fig. S2C**, as well as replicates 2 (*E*) and 3 (*F*). Black and  
1163 blue arrowheads indicate MKRN1 and GFP-PABPC1, replicates. (*G-I*) Endogenous  
1164 MKRN1 interacts with GFP-ELAVL1 independent of RNA. Western blot analysis was  
1165 performed with antibodies against MKRN1 and GFP. Images of full membranes and  
1166 different exposure times for both antibodies are shown for replicate 1 (*G*) which is  
1167 presented in **Supplemental Fig. S2C**, as well as replicates 2 (*H*) and 3 (*I*). (*J-L*)  
1168 Endogenous MKRN1 interacts with GFP-IGF2BP1 independent of RNA. Western blot  
1169 analysis was performed with antibodies against MKRN1 and GFP. Images of full  
1170 membranes and different exposure times for both antibodies are shown for replicate 1  
1171 (*J*) which is presented in **Supplemental Fig. S2C**, as well as replicates 2 (*K*) and 3  
1172 (*L*).

1173

1174 **Supplemental Figure S10.** Images of full membranes of autoradiographs and  
1175 Western blot analyses in **Fig. 3D** (replicate 1) and **Supplemental Fig. S5** (replicates  
1176 2 and 3). UV crosslinking experiments to measure the RNA binding capacity of GFP-  
1177 MKRN1<sup>wt</sup> and GFP-MKRN1<sup>PAM2mut</sup>. Autoradiographs (*A*, left; *B*, top) and Western blots  
1178 (*A*, right; *B*, bottom) show GFP-MKRN1/RNA complexes and GFP-MKRN1 protein,  
1179 respectively, in the eluates from replicates 1 and 2 (with 4SU and UV crosslinking at  
1180 365 nm) (*A*) and 3 (with conventional UV crosslinking at 254 nm) (*B*). (*B*) Images of full  
1181 membranes of Western blot analyses with both antibodies are shown for replicate 3  
1182 (*B*).

1183

1184 **Supplemental Figure S11.** Images of full membranes and different exposure (exp.)  
1185 times for Western blot analyses in **Supplemental Fig. S6B,D,E.** (A,B) KDs of *MKRN1*  
1186 and *ZNF598* assessed by Western blot (n = 3 replicates) from **Supplemental Fig.**  
1187 **S6B.** Western blot analysis was performed with antibodies against MKRN1, ZNF598,  
1188 and tubulin. Black and blue arrowheads indicate MKRN1 (53 kDa) and ZNF598 (99  
1189 kDa), respectively. Uncropped gel images of replicates 1 and 2 (A) and 3 (B). (C,D)  
1190 Images of full membranes are shown for cross-regulation between *MKRN1* and  
1191 *ZNF598* KD from **Supplemental Fig. S6D.** *MKRN1* KD1 reduces endogenous ZNF598  
1192 protein levels. Western blot analysis was performed with antibodies against MKRN1,  
1193 ZNF598, and tubulin. Coloured arrowheads as in (A). Uncropped gel images of  
1194 replicate 1 (C) and replicates 2 and 3 (D). (E,F) Images of full membranes are shown  
1195 for cross-regulation of *MKRN1* and *ZNF598* overexpression (OE) from **Supplemental**  
1196 **Fig. S6E.** *ZNF598* OE reduces MKRN1 protein levels. Western blot analysis was  
1197 performed with antibodies against MKRN1, ZNF598, and tubulin. Black arrowheads  
1198 indicate MKRN1. Images of full membranes and different exposure times (exp.) for  
1199 both antibodies are shown for replicates 1, 2 (E), and 3 (F). Note the opposite order of  
1200 replicates 1 and 2 (2 left, 1 right) in (E).

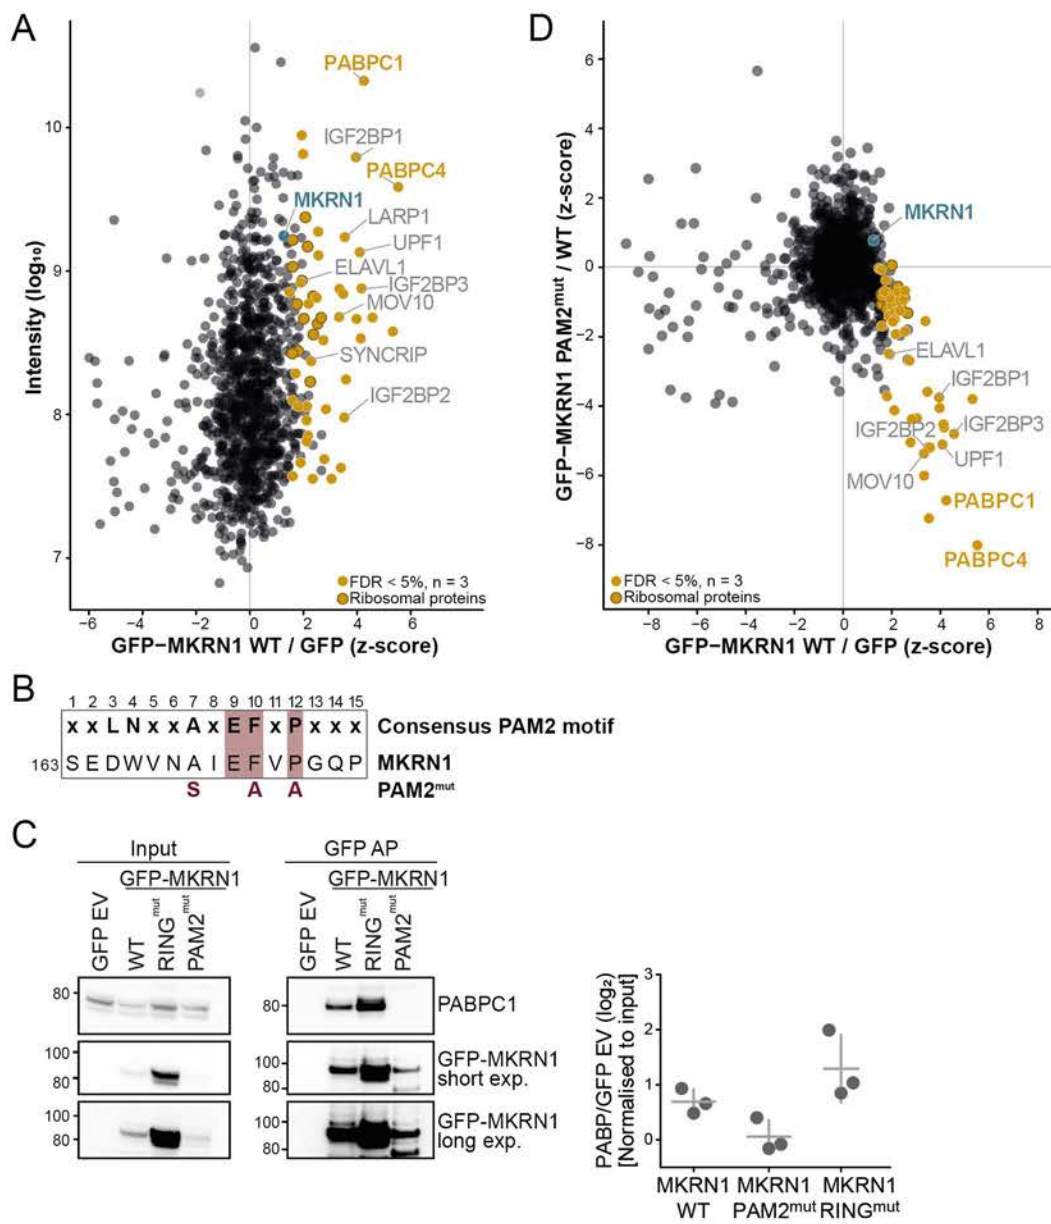

Hildebrandt\_Fig2

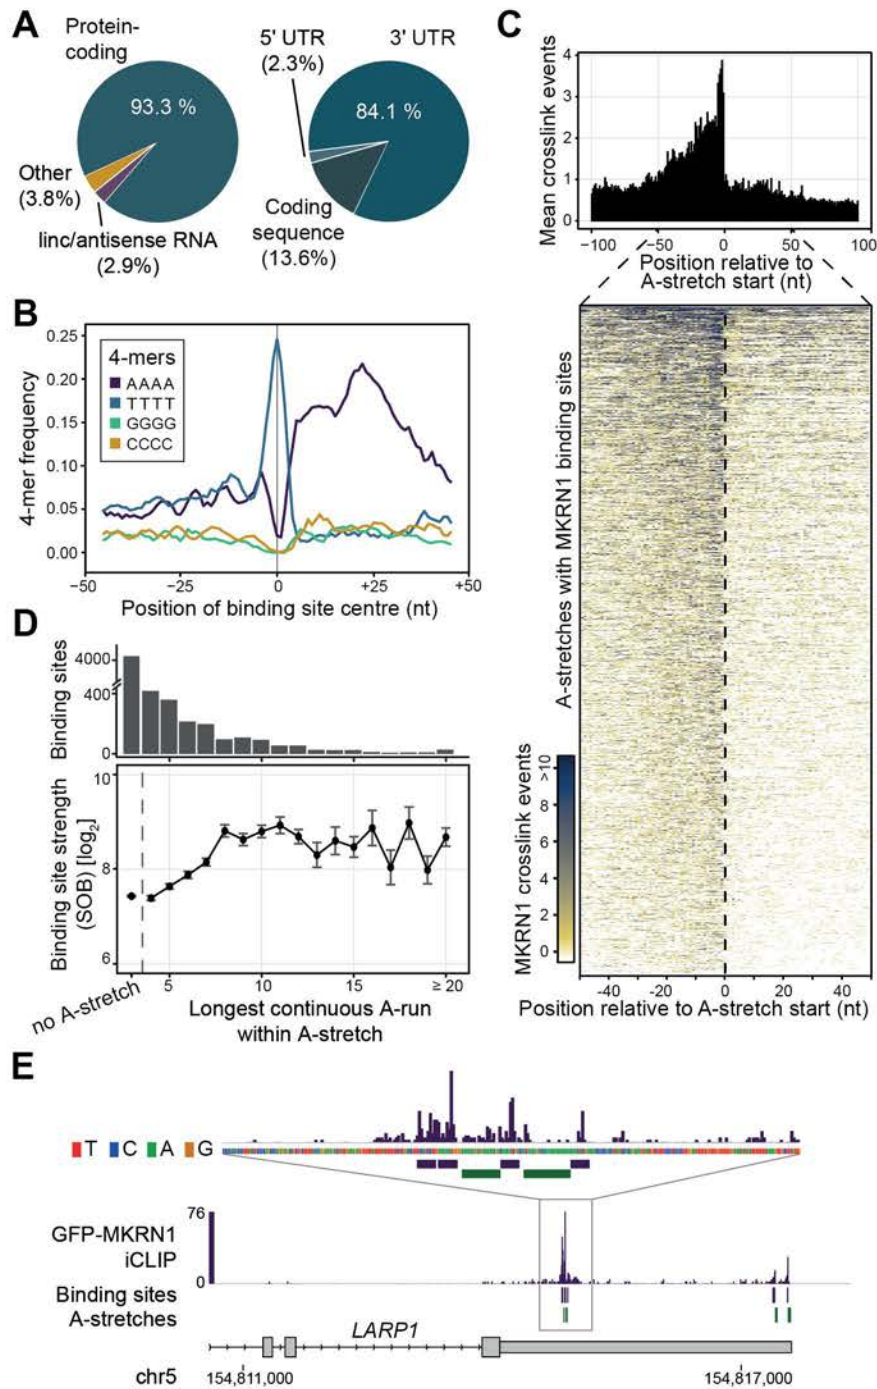

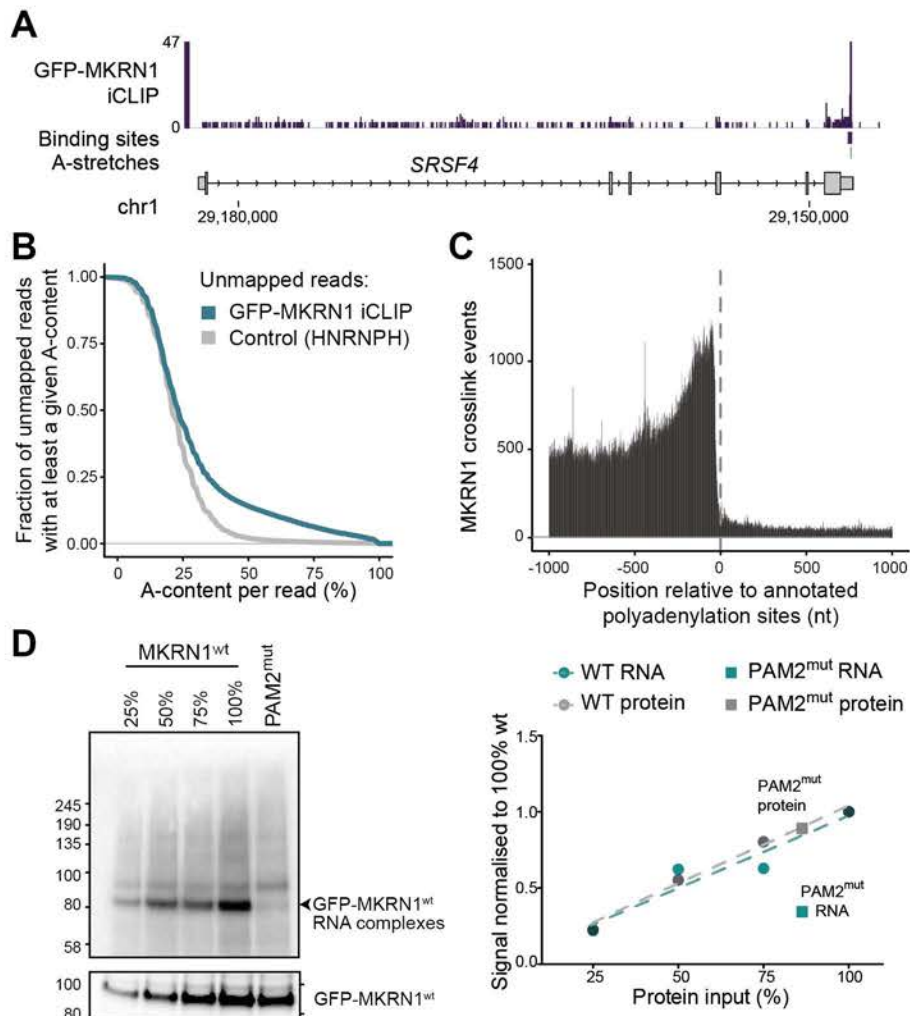



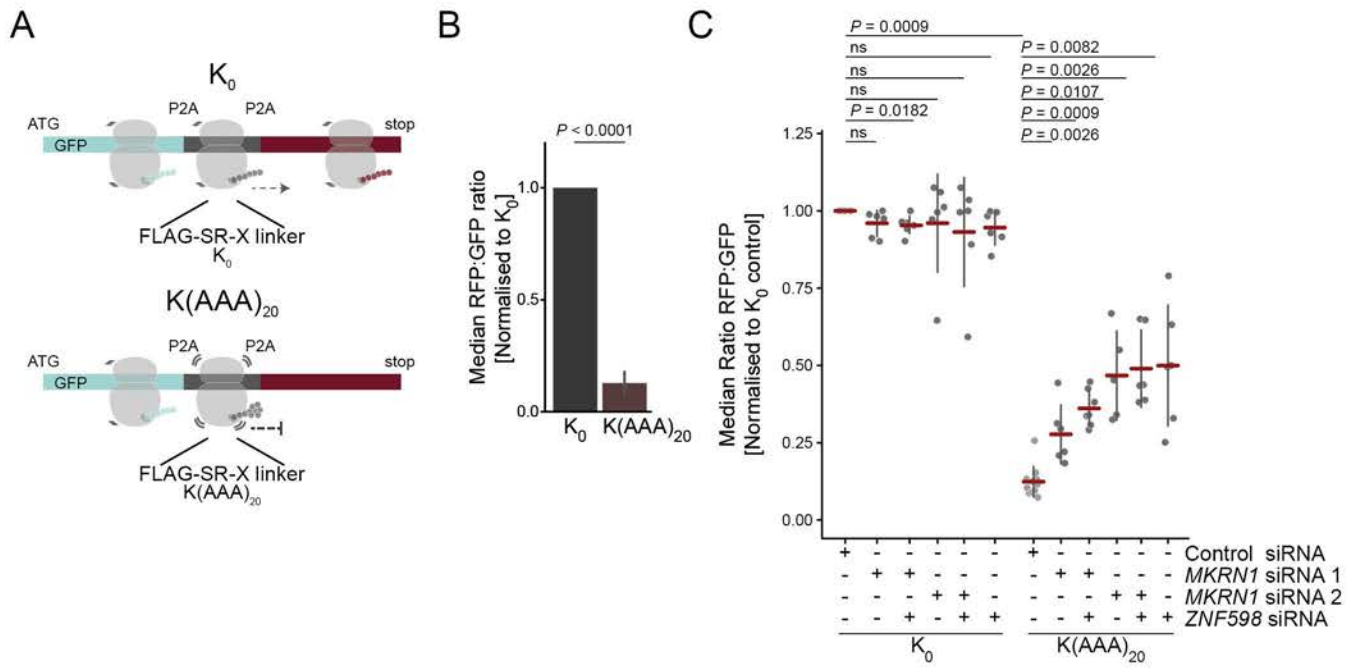

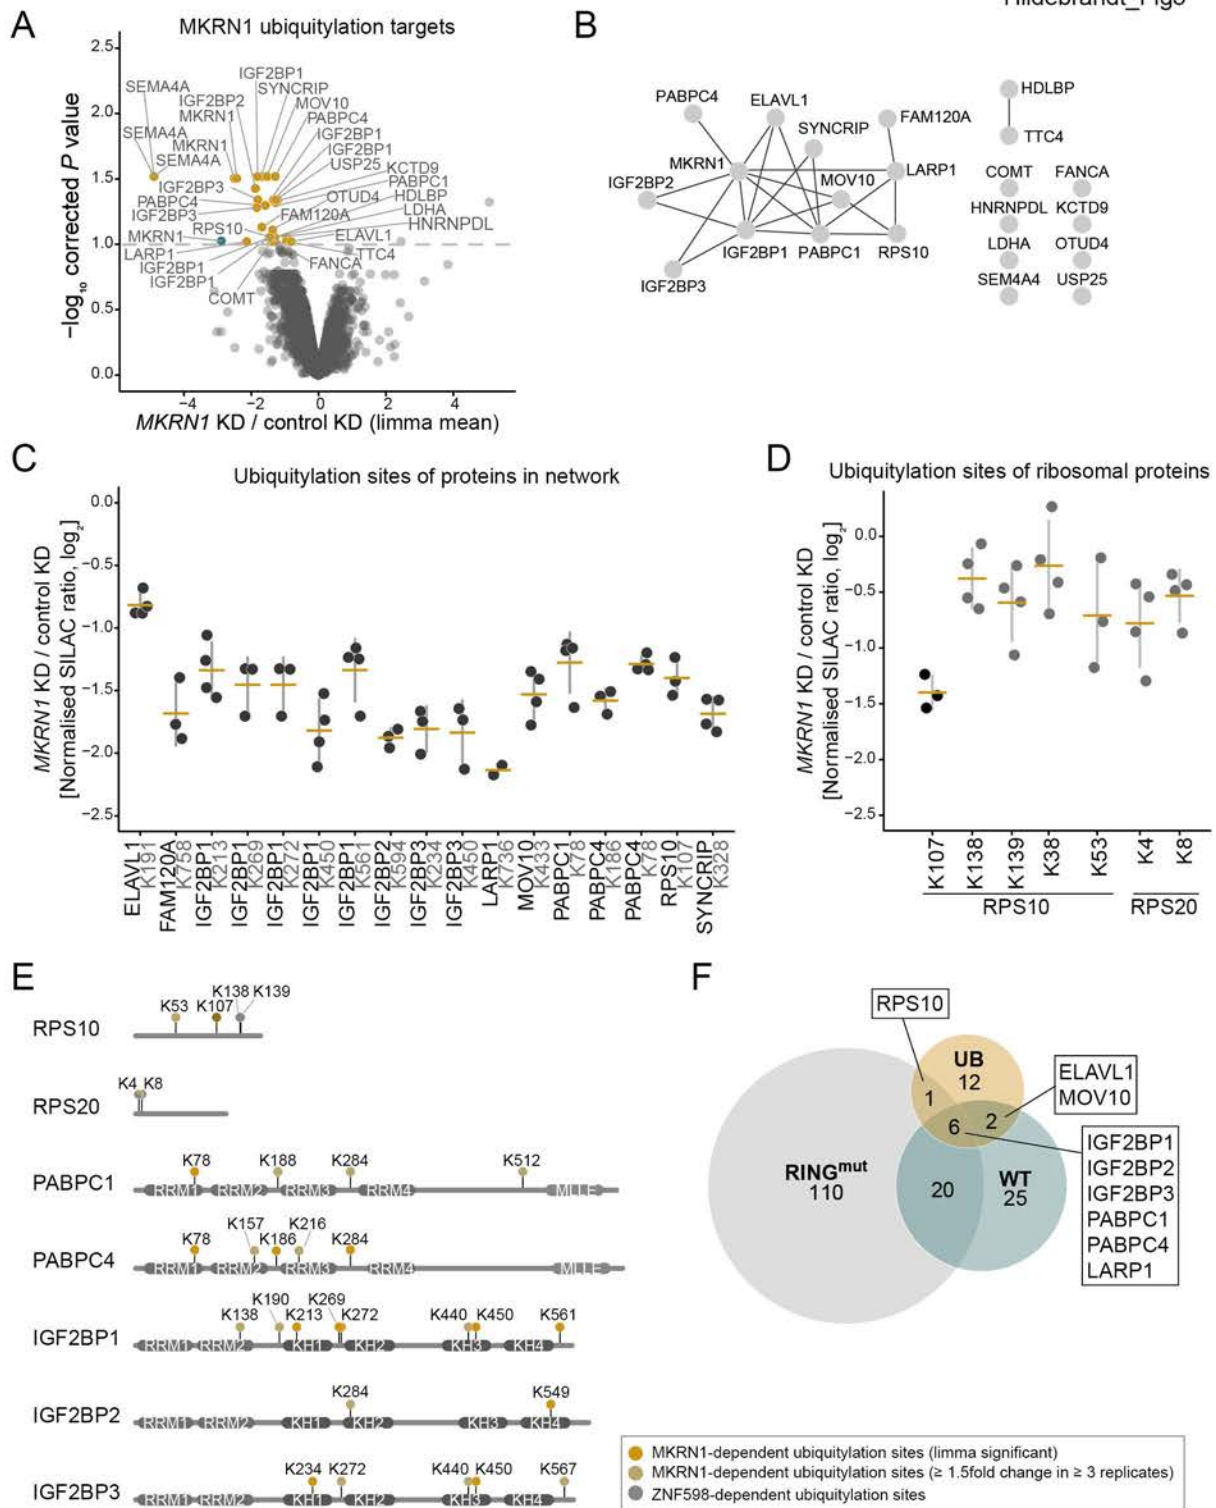

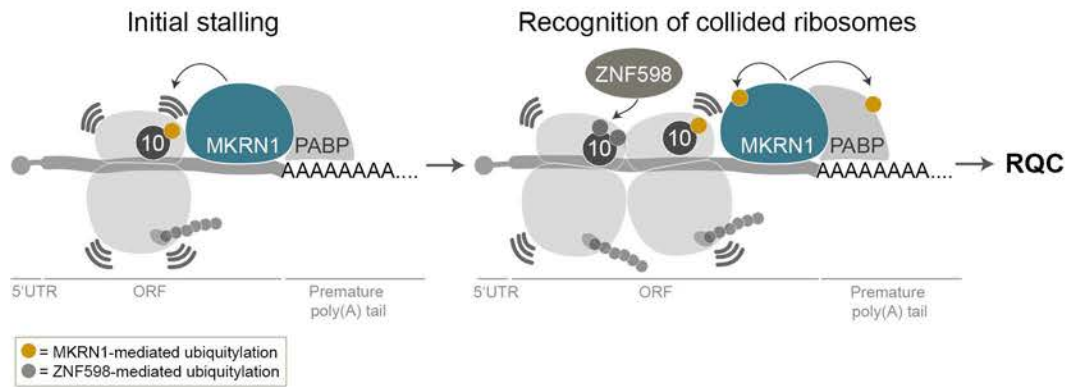

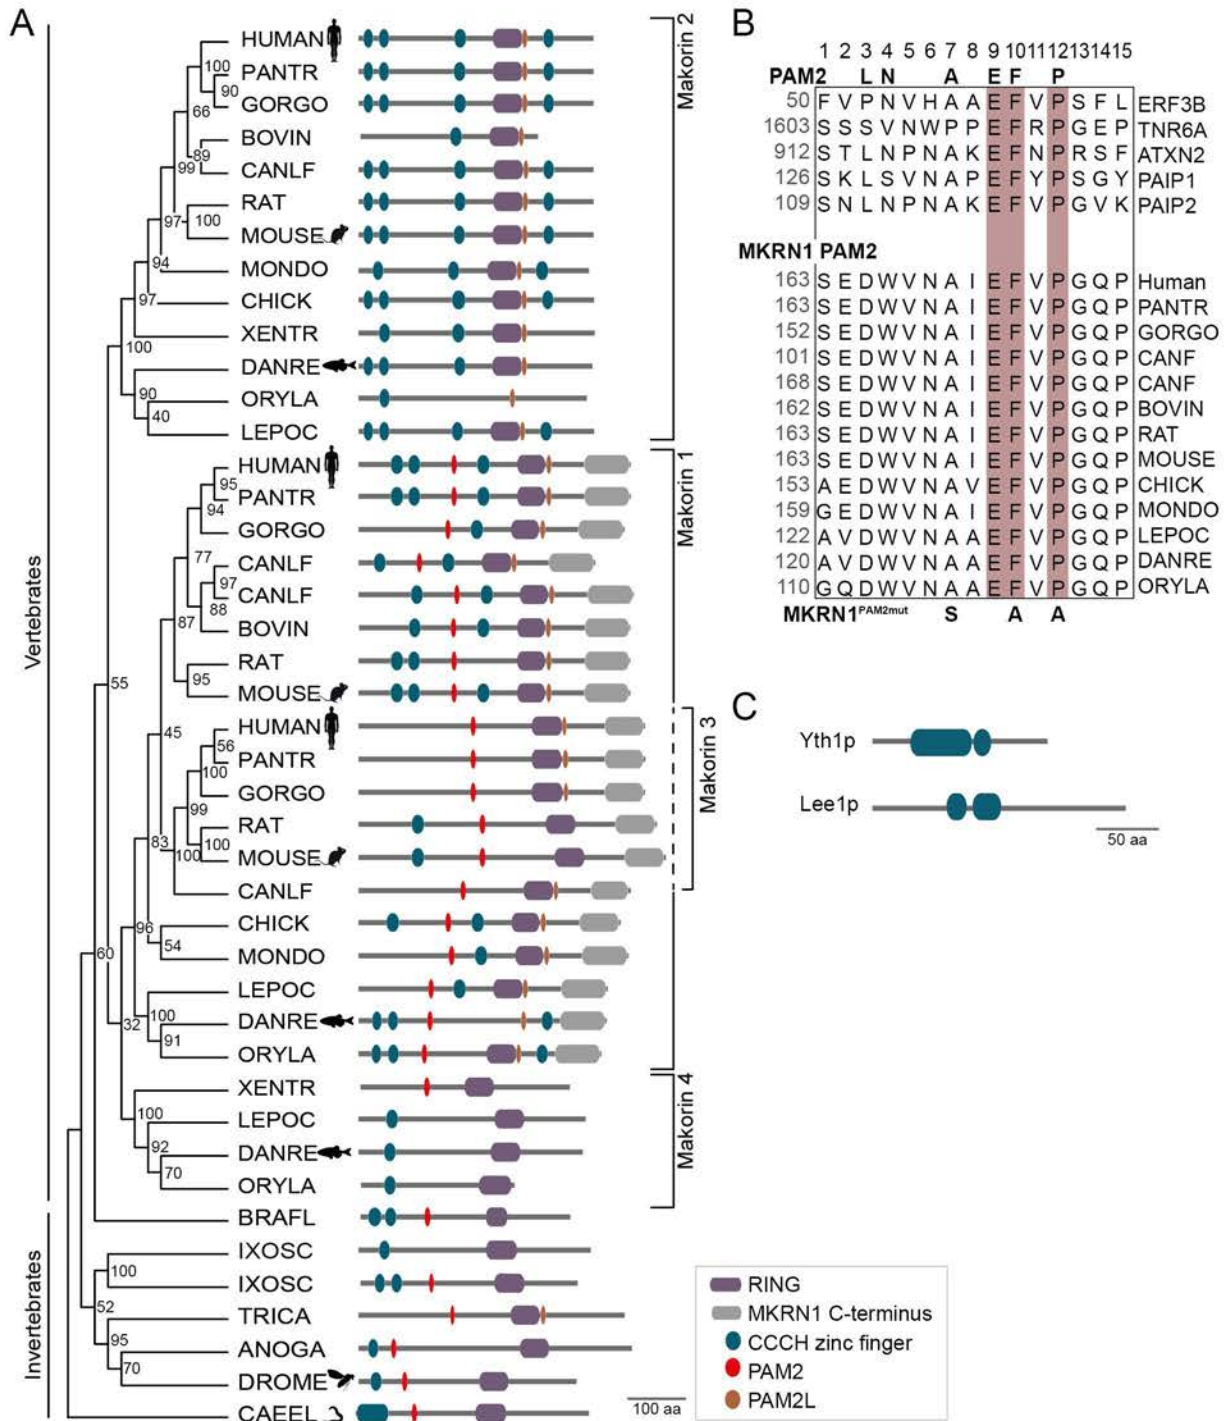

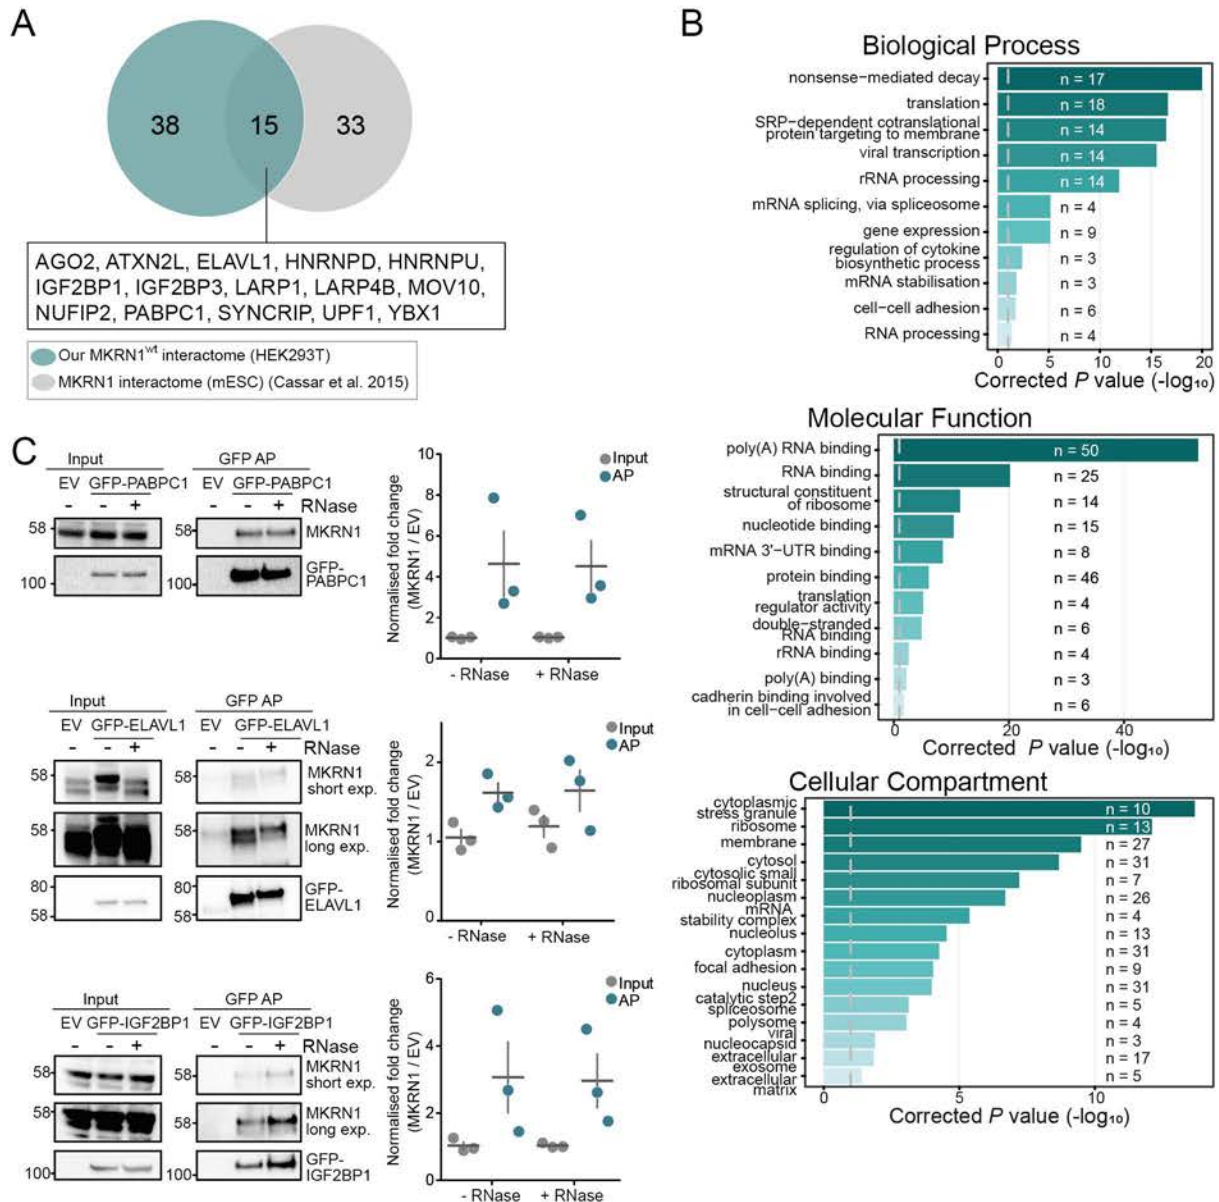

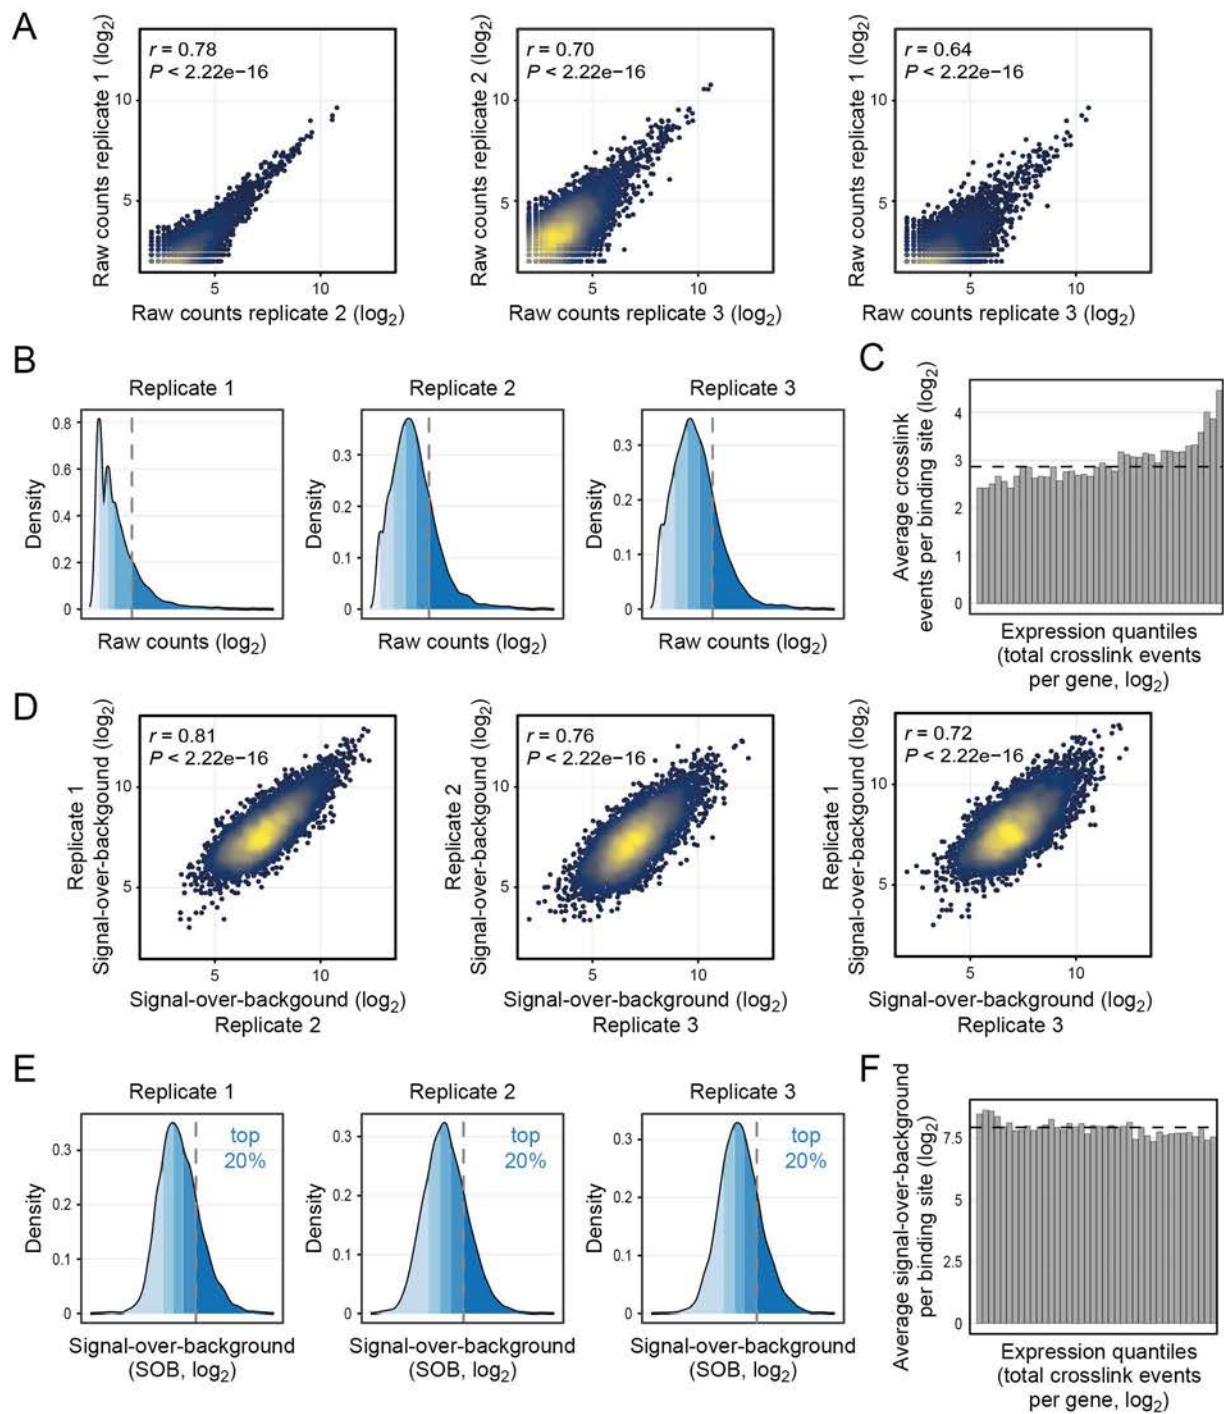

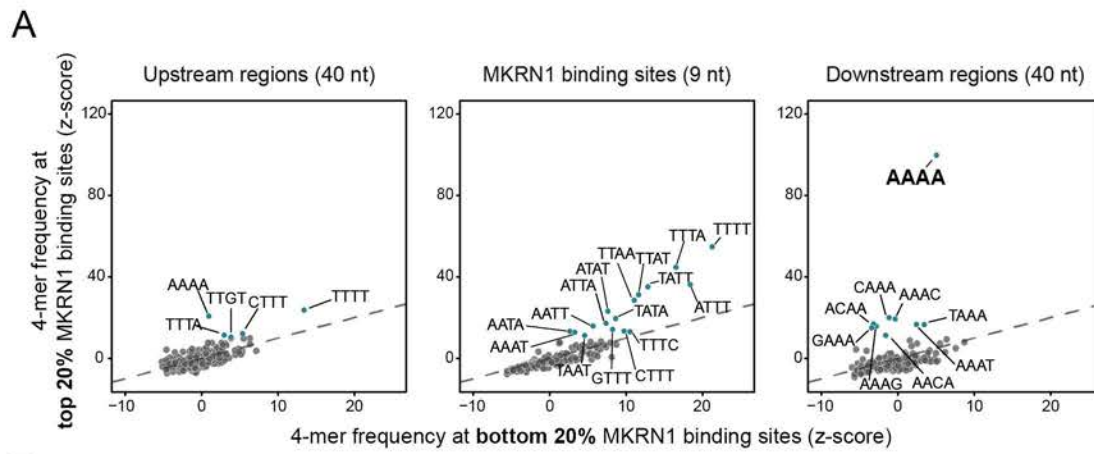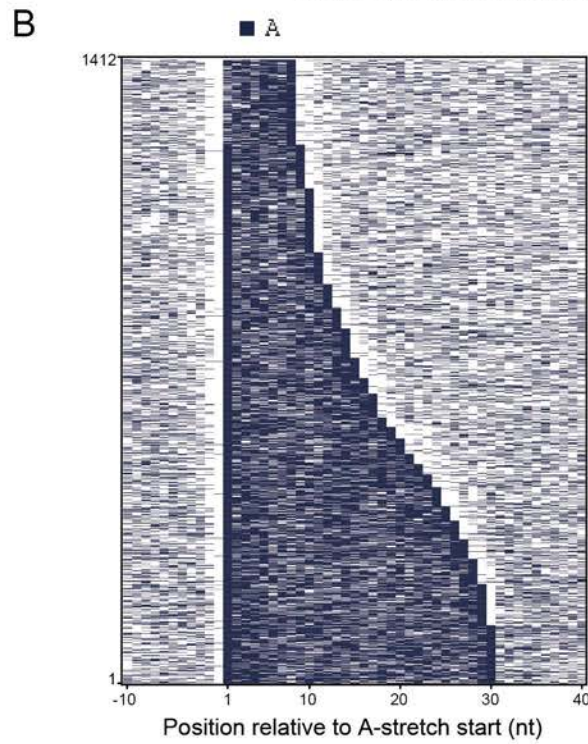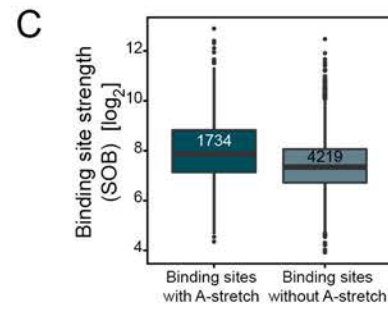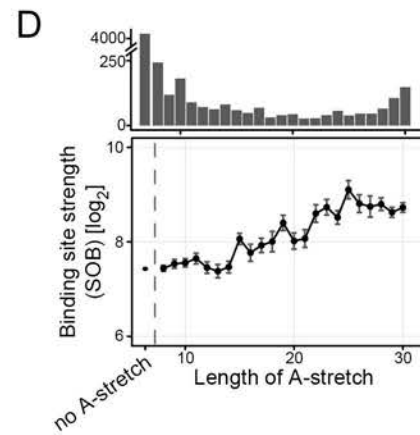

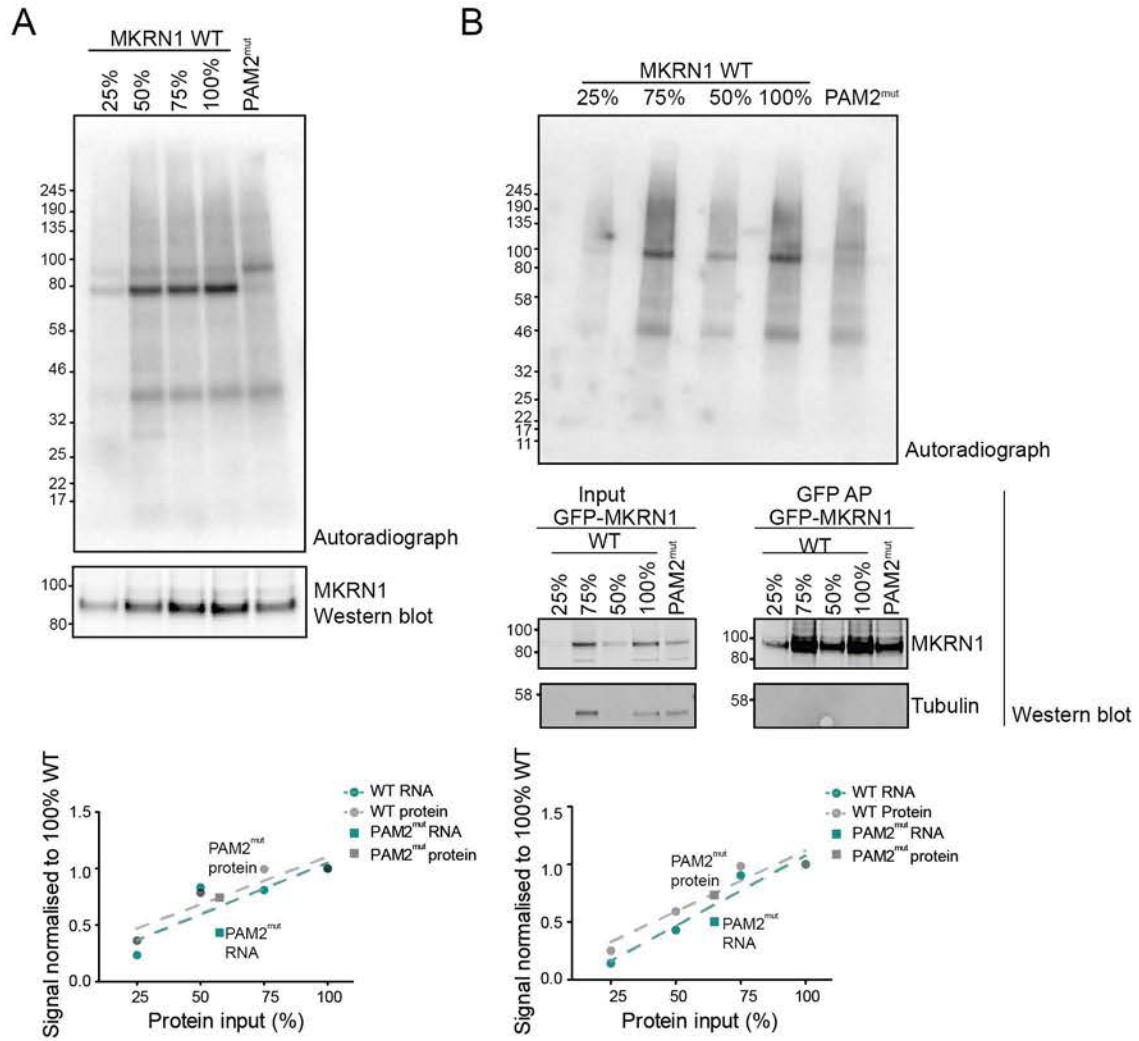



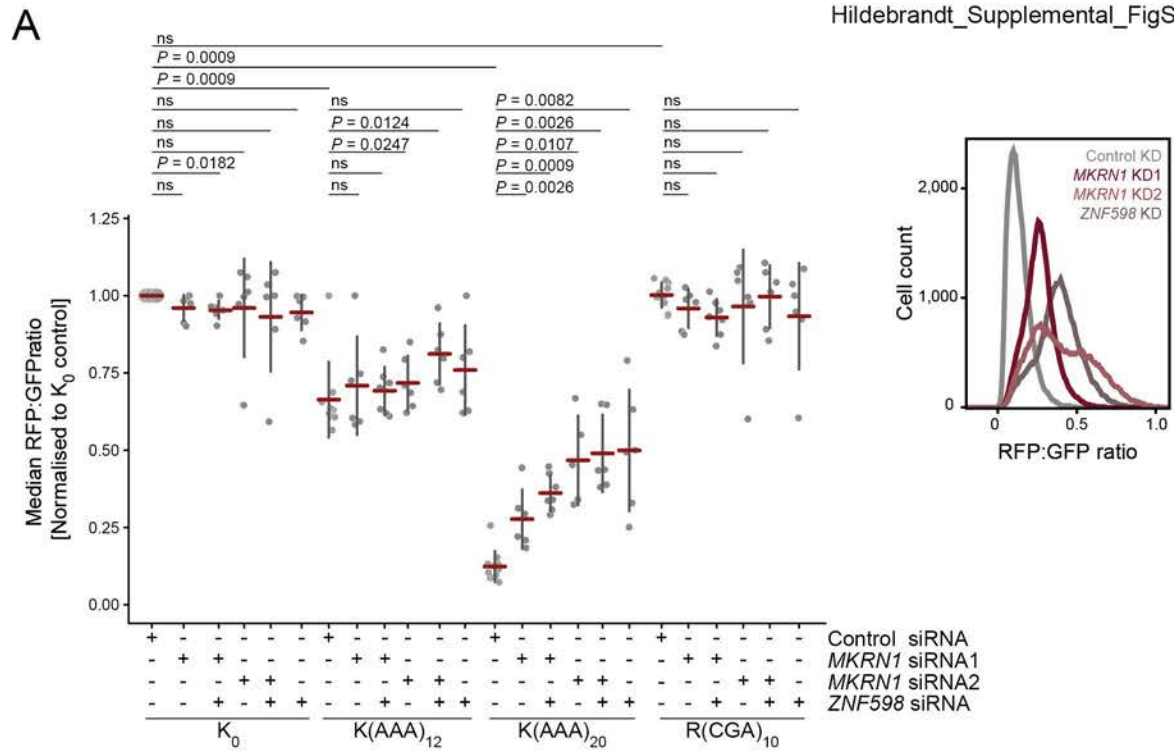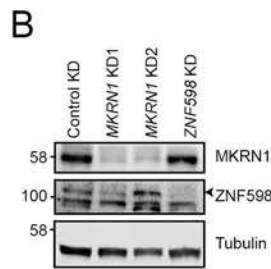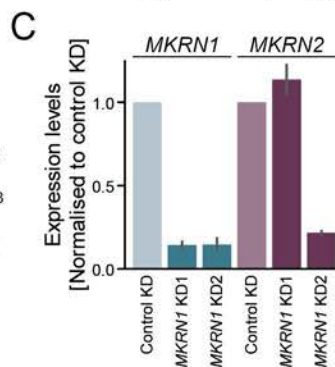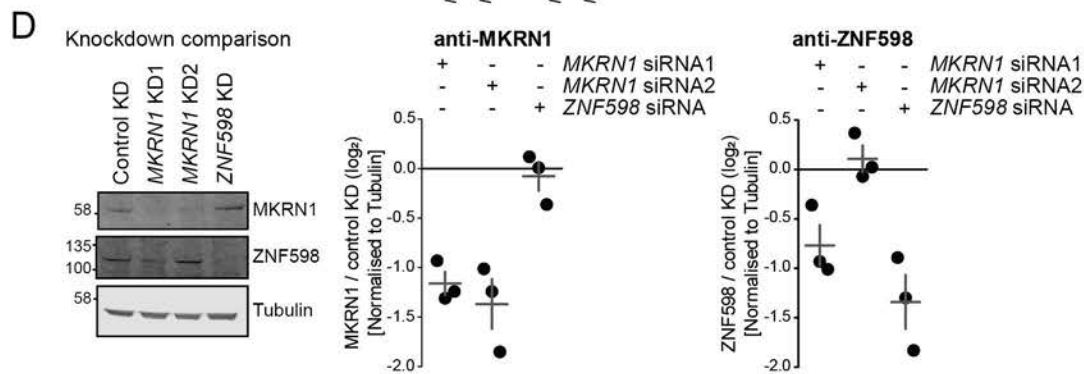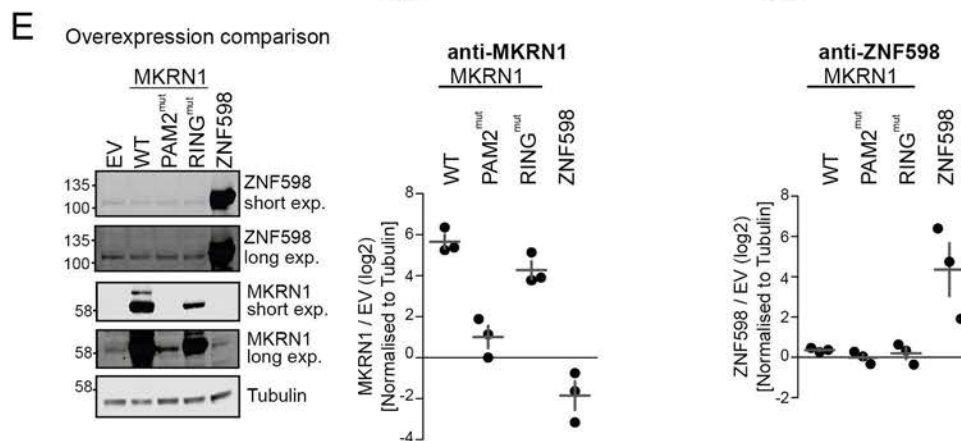

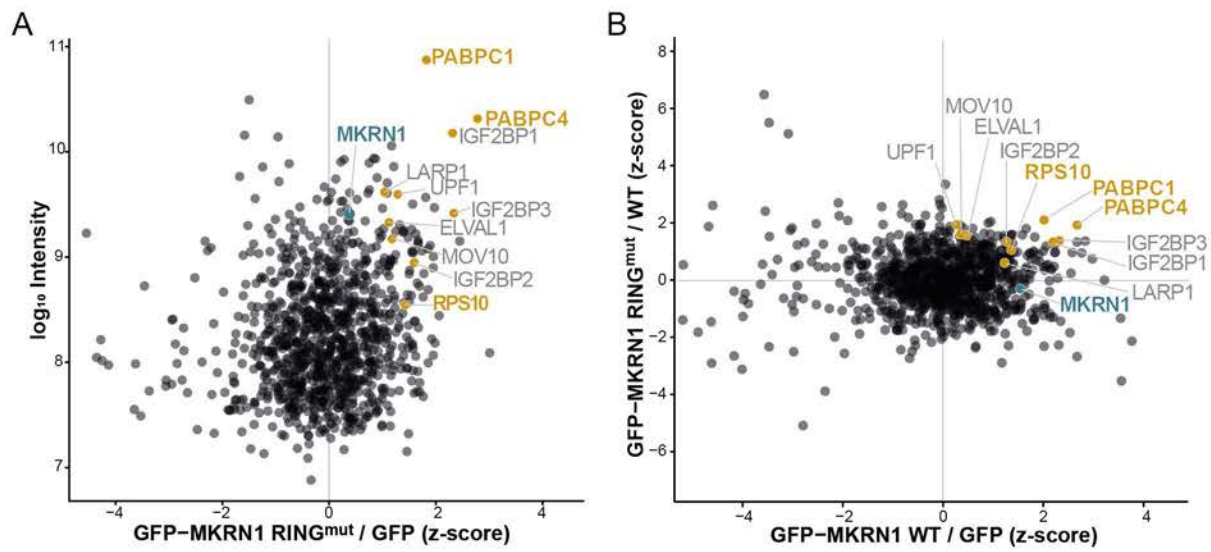

A

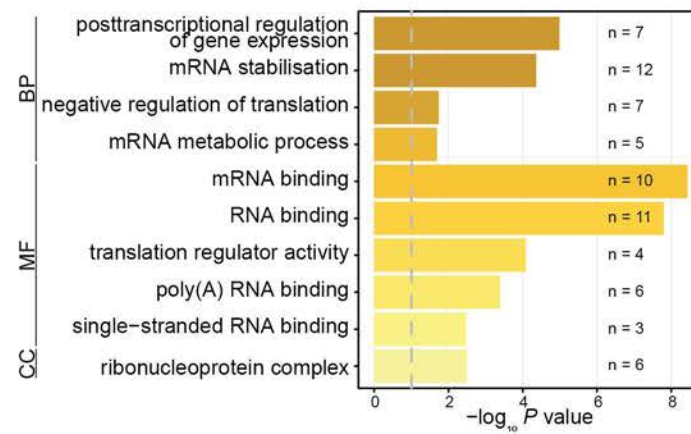

B

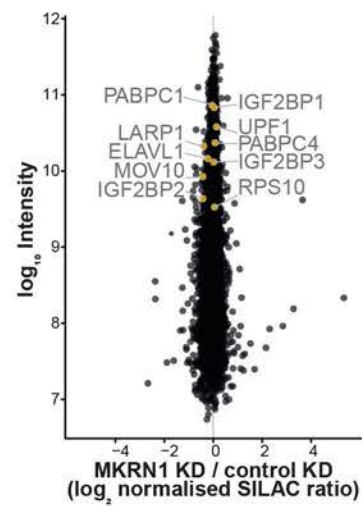

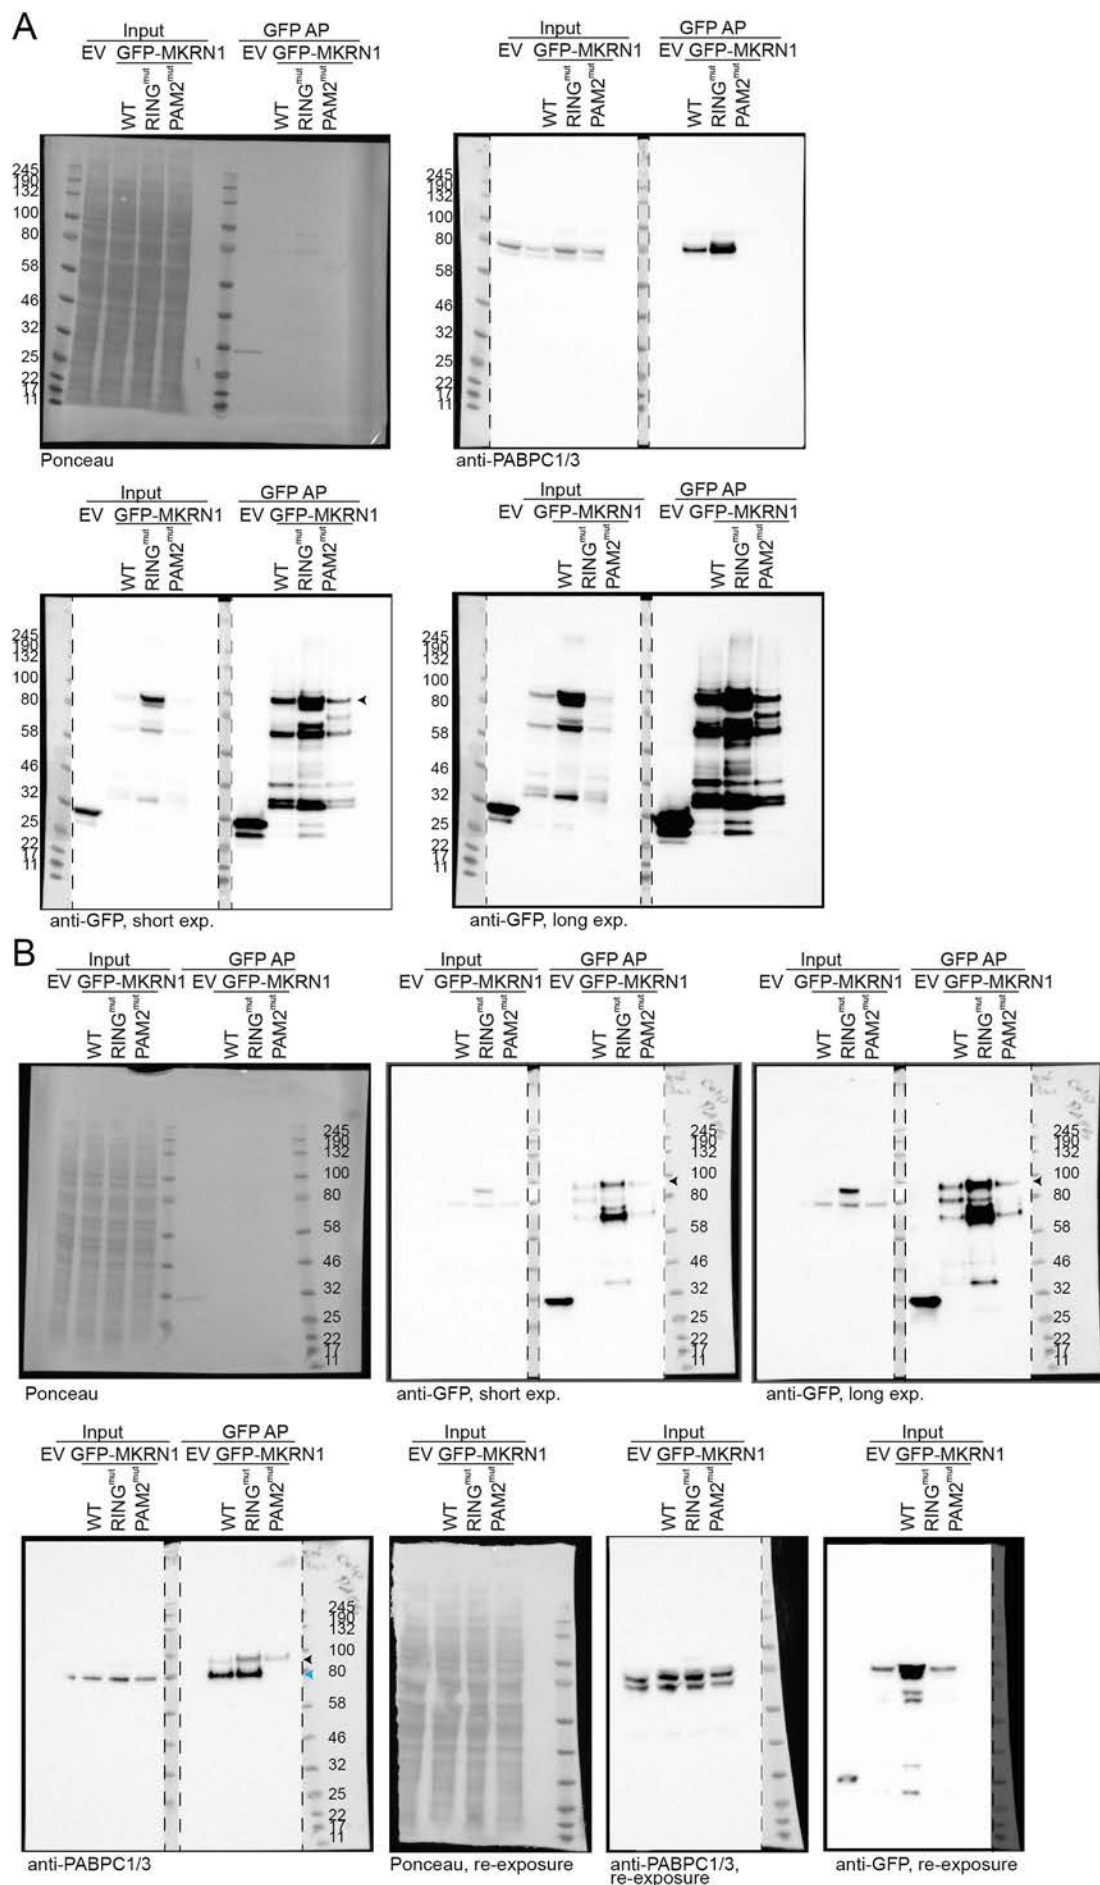

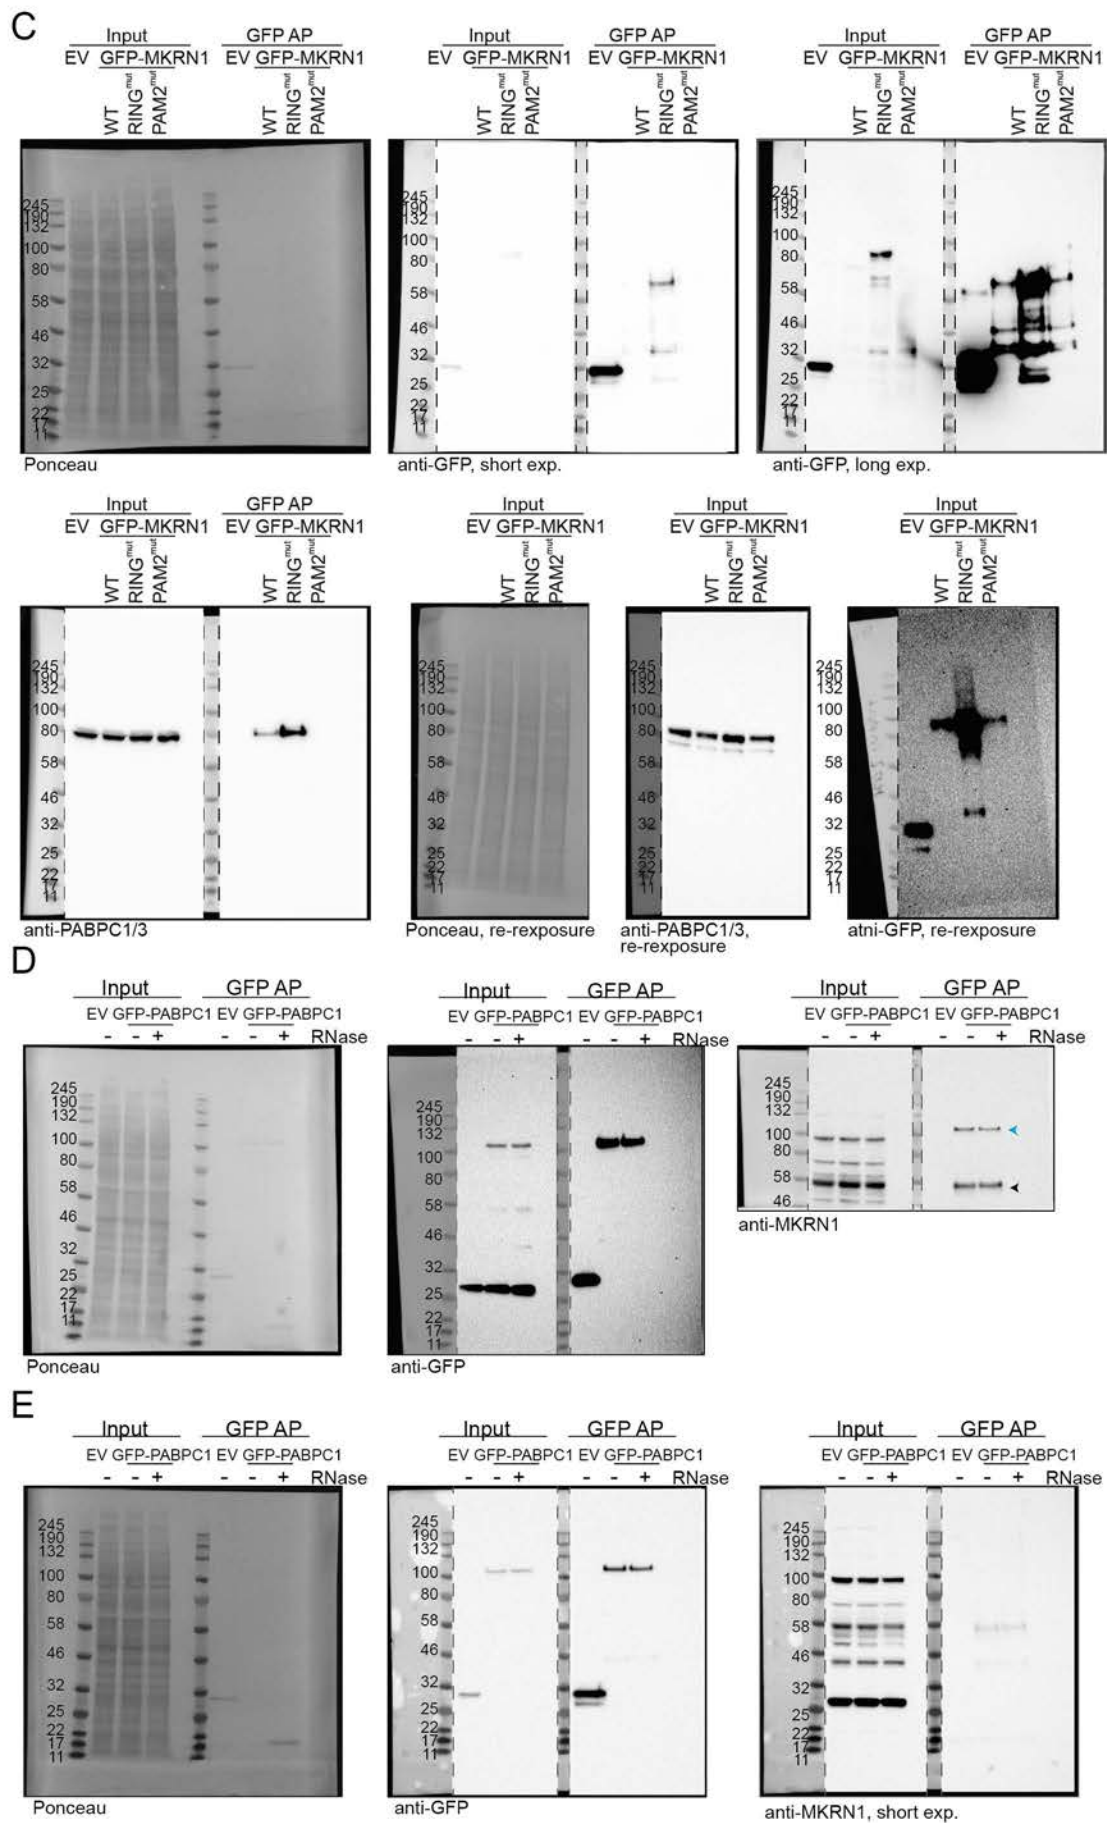

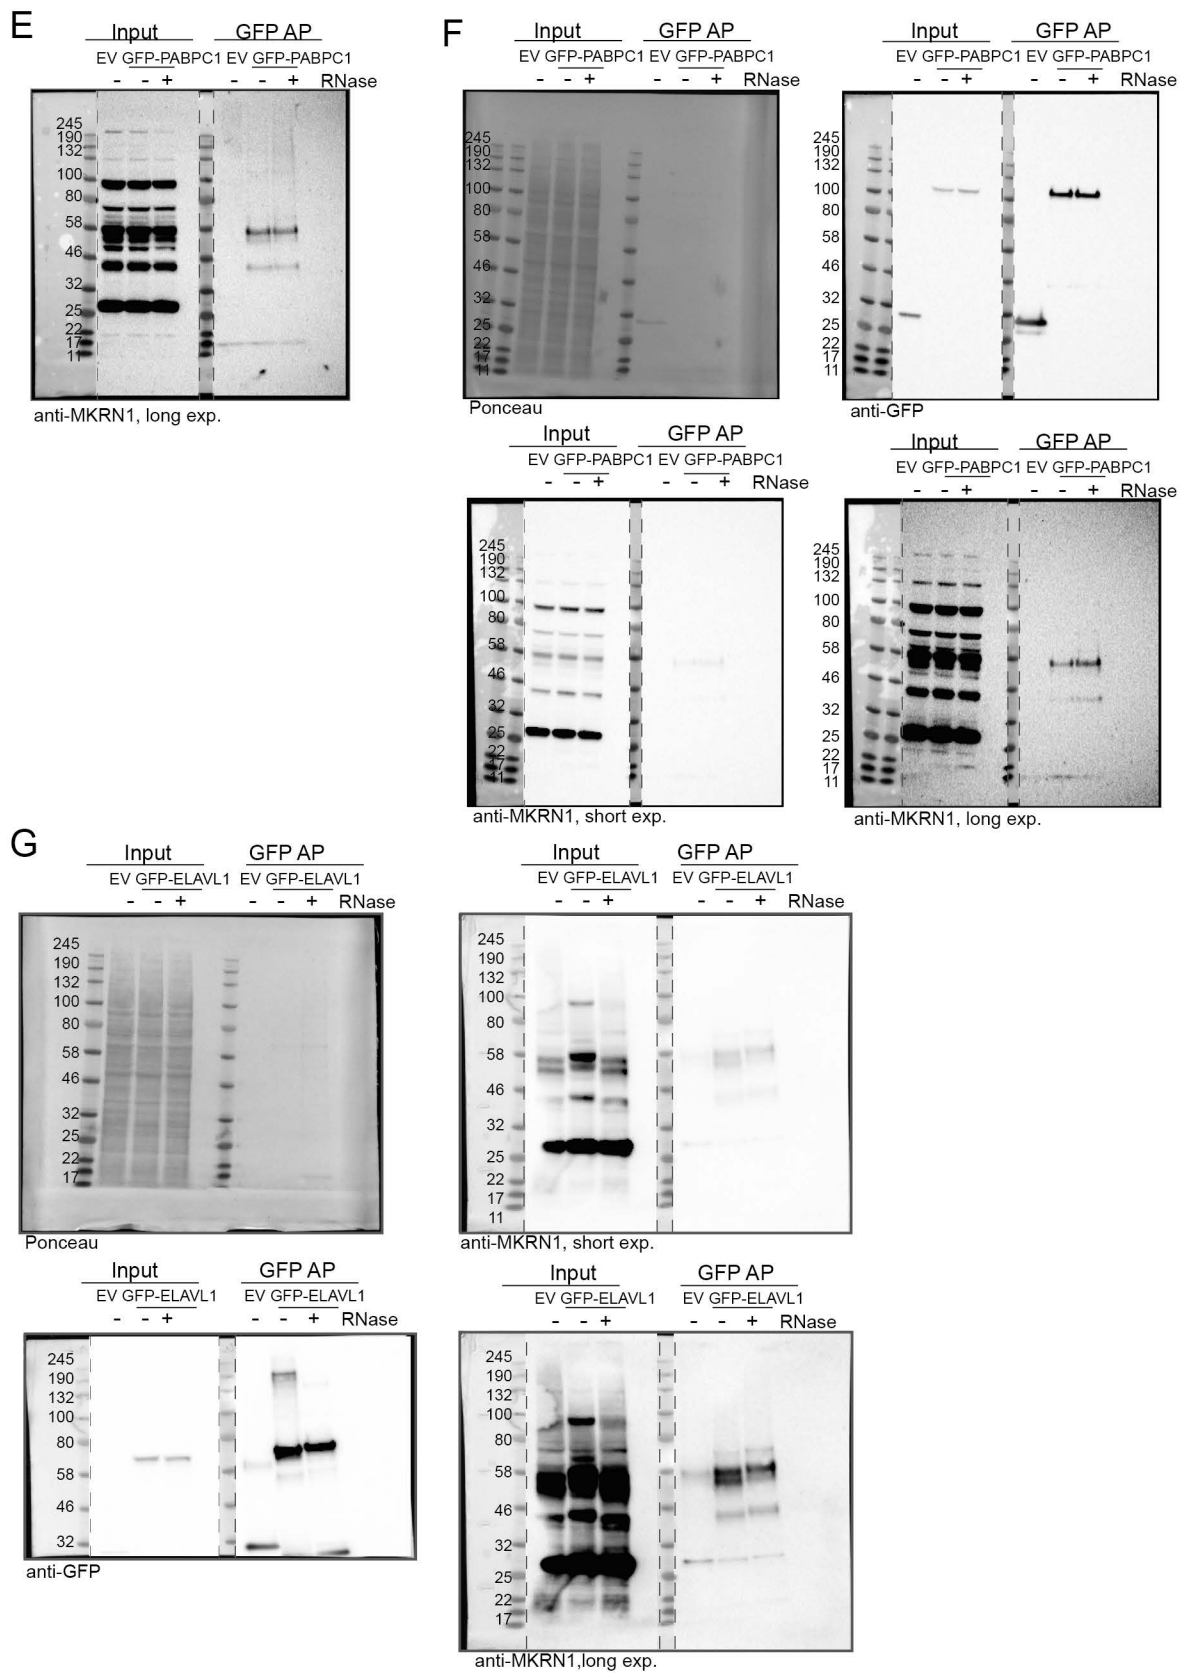

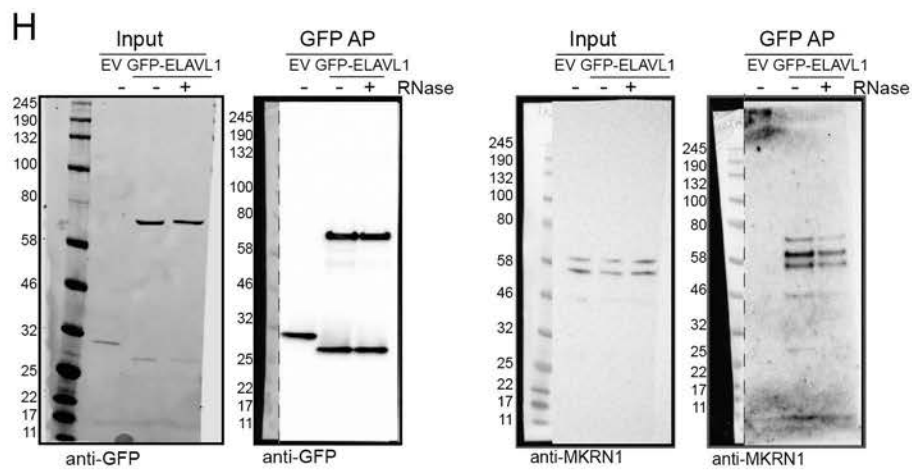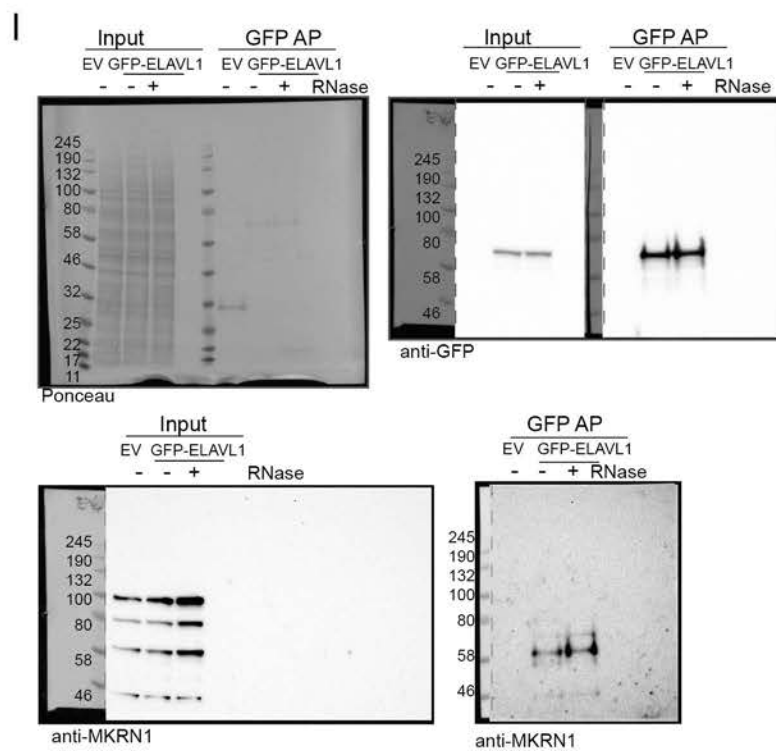

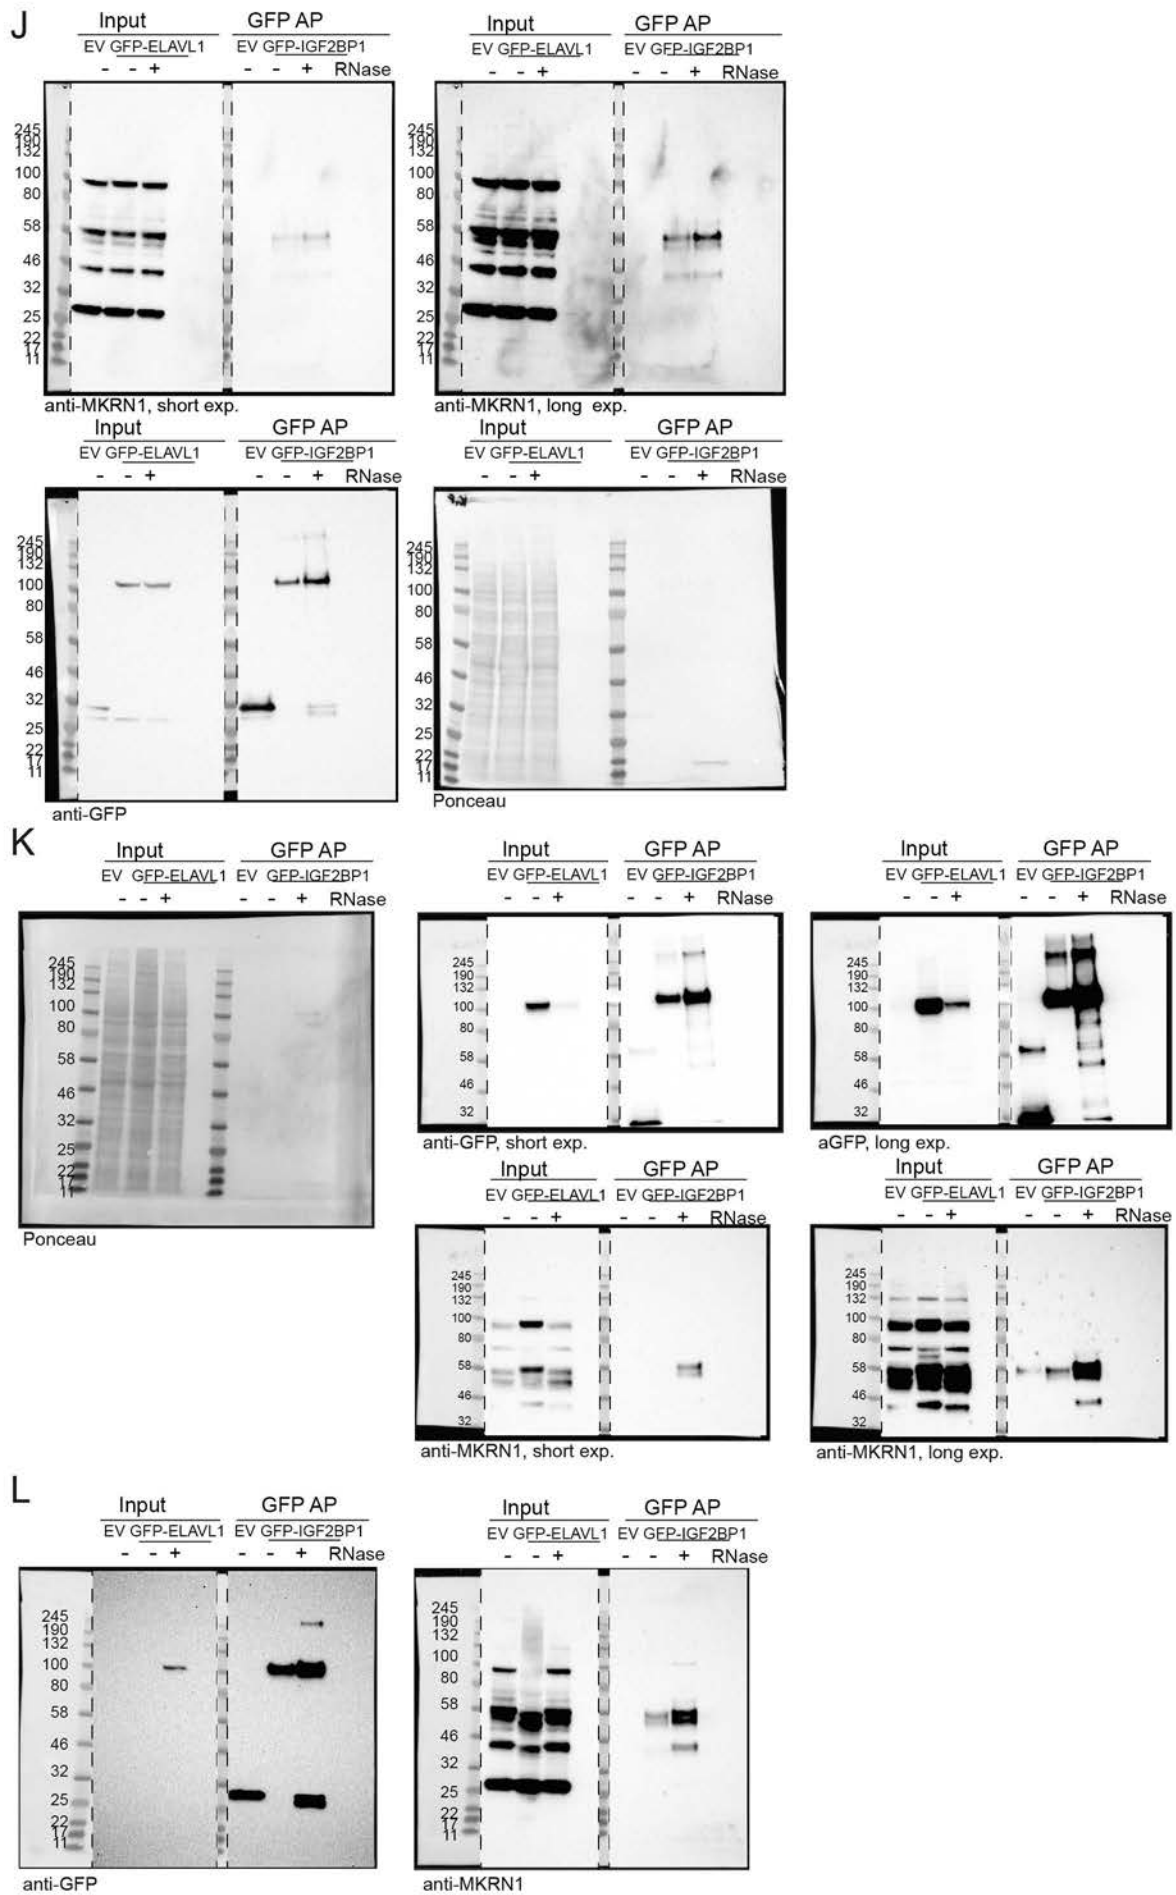



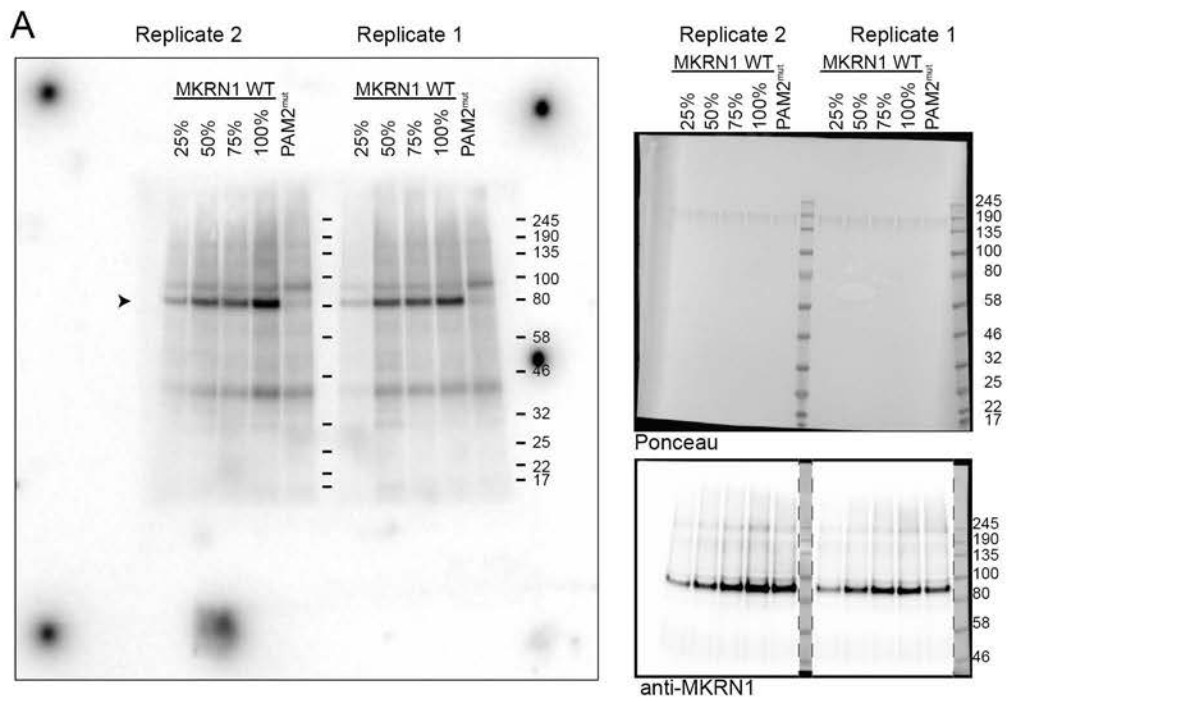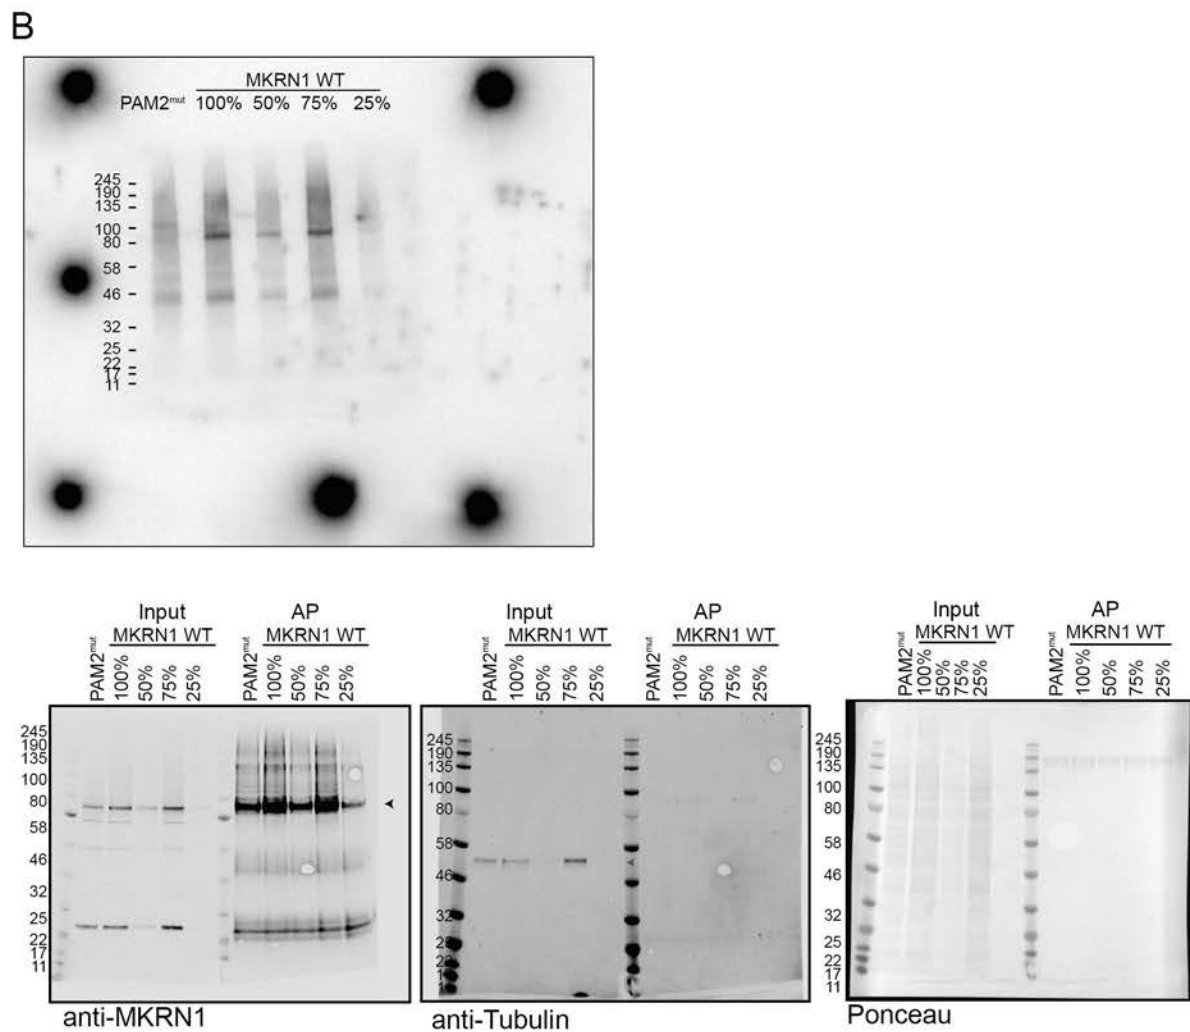

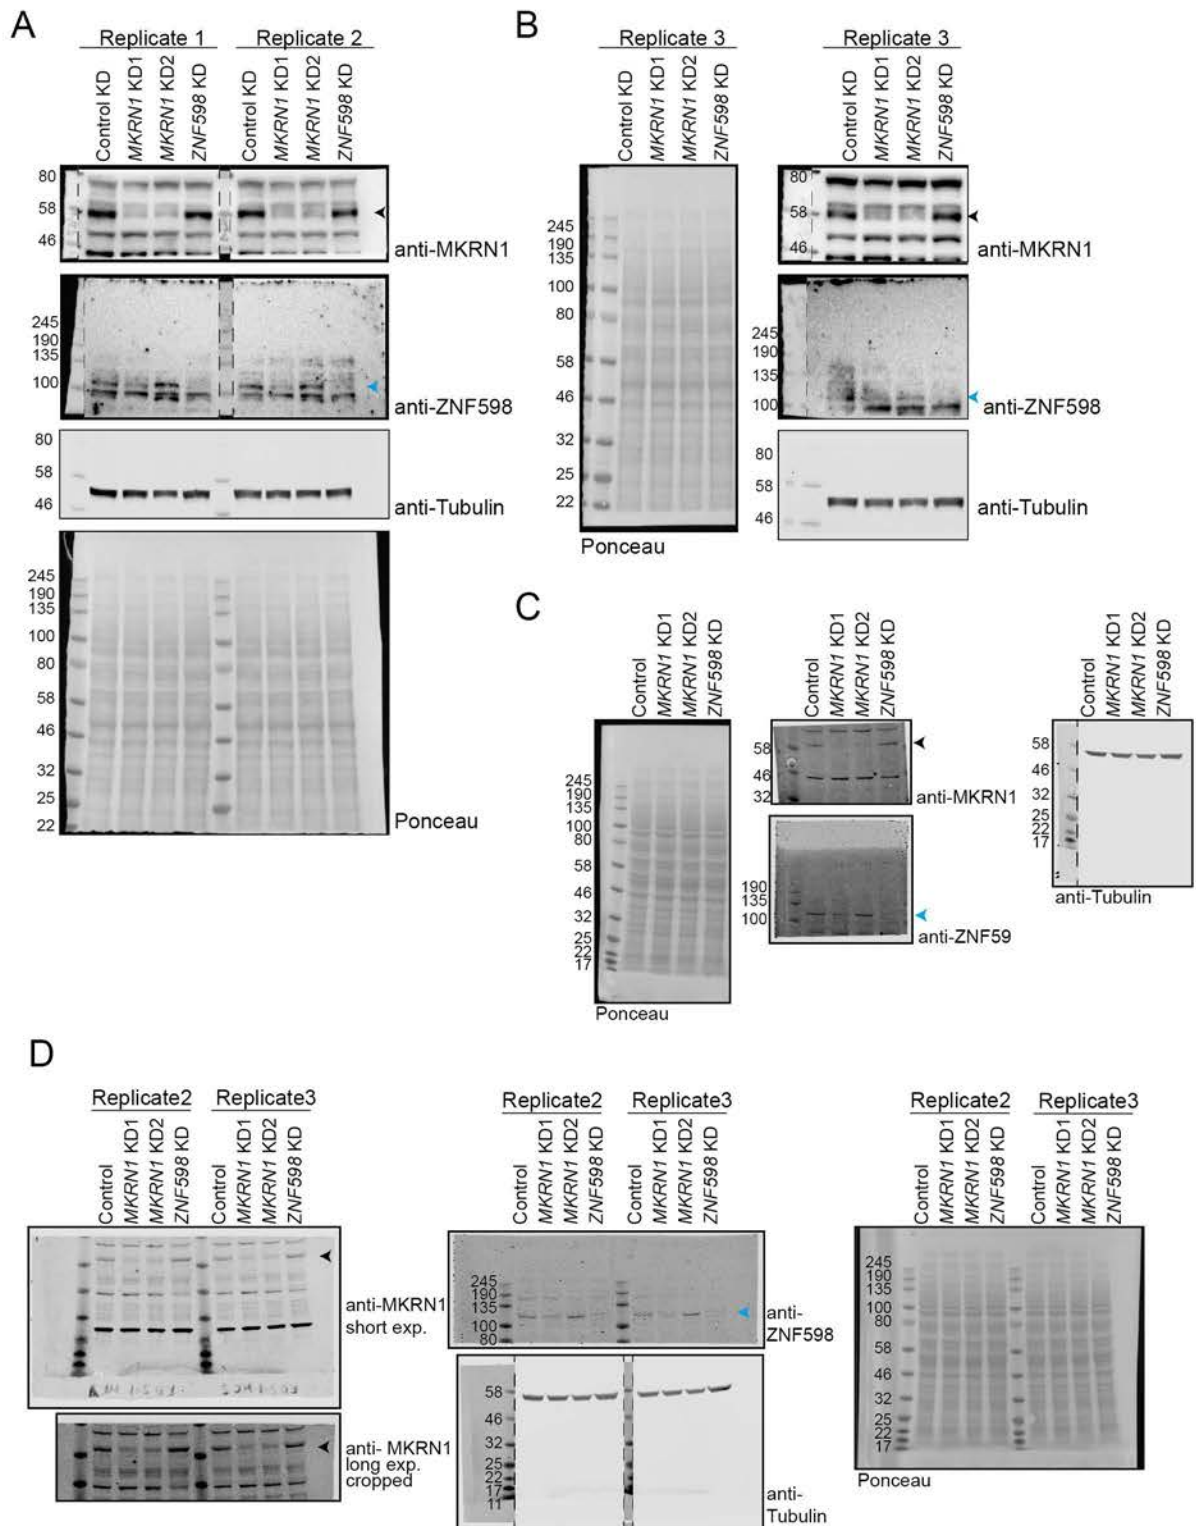

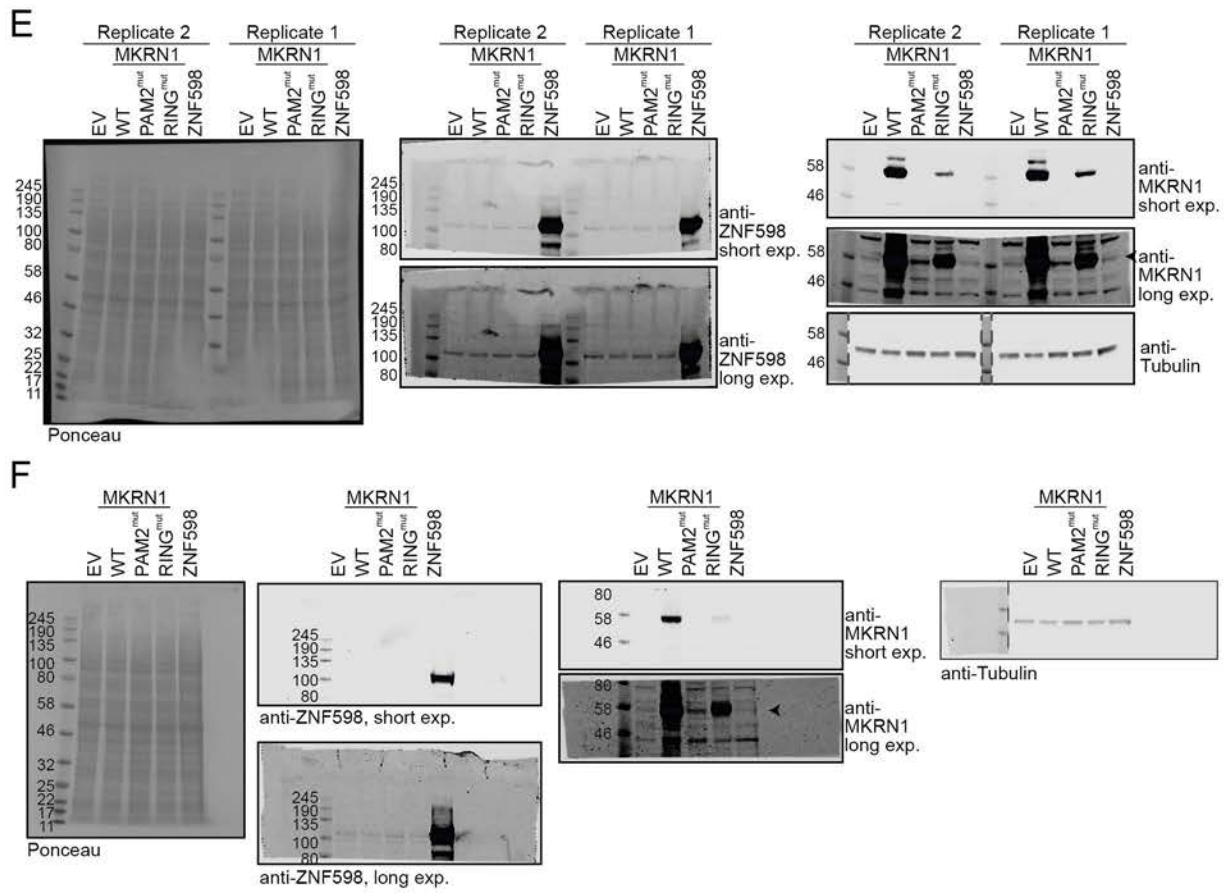

Source: https://www.biorxiv.org/content/10.1101/516005v2.full.pdf
